# Supplementary material
Source: PubMed Central journal article supplement (PMC3384182)
Supplement: 1117508109_sapp.pdf [file 1117508109_sapp.pdf]

## Supporting Information

### 1. Variation in % overcalcified of detached coccoliths

Free coccoliths of *E. huxleyi* were counted in each sample. The free coccoliths were always more numerous than the coccospheres, which allowed for larger sample sizes (> 300 liths categorised) and therefore greater confidence in the percentage contribution of each morphotype to the total population. The trend identified (Supplementary Figure S1) is the same as found for the intact coccospheres (Figure 2, main text).

### 2. Statistics

In order to test for statistical significance of the summer-winter morphotype differences, summer and winter months were compared. For each month the data consisted of the % overcalcified values for all stations within the Bay of Biscay (44-46°N) where at least 5 cells were viewed. The three months December, February and March were chosen as representative of winter, the three months May, June and July as representative of summer:

December = {100, 82, 100, 88, 91, 91, 78}

February = {100, 96, 96, 97, 98, 98, 92}

March = {71, 74, 86, 88, 75, 94, 97}

May = {20, 5, 0, 31, 0, 0, 0}

June = {9, 0, 0, 0, 0, 0}

July = {0, 0, 0, 0, 0}

A one-tailed Student's t-test was used to test the null hypothesis that there was a similar or greater proportion of overcalcified morphotypes in the summer than in the winter. Each of the summer months was separately compared to each of the three winter months, leading to 3x3=9 tests in total. In each case the t-test clearly shows the null hypothesis to be falsified. There is a significantly greater proportion of overcalcified cells in each winter month than in each summer month ( $p \ll 0.001$ ).

## Supporting Tables S1 – S25

Table S1 – September 2008

| DATE |       |     |       | LOCATION |        | COCCOLITHOPHORES |                |                           |                           |                           |                           |                 |
|------|-------|-----|-------|----------|--------|------------------|----------------|---------------------------|---------------------------|---------------------------|---------------------------|-----------------|
| year | month | day | time  | Lat      | lon    | number counted   | volume counted | concentration mean        | standard error            | 95% confidence interval   |                           | % overcalcified |
|      |       |     | (UTC) | (°N)     | (°E)   |                  |                |                           |                           | lower                     | upper                     |                 |
|      |       |     |       |          |        | (cells)          | (mLitres)      | (cells mL <sup>-1</sup> ) | (%)             |
| 2008 | Sep   | 18  | 12:11 | 43.475   | -3.128 | 8                | 0.929          | 8.6                       | 3.0                       | 2.5                       | 14.7                      | 0               |
| 2008 | Sep   | 18  | 12:59 | 43.728   | -3.214 | 1                | 1.115          | 0.9                       | 0.9                       | 0.0                       | 2.7                       |                 |
| 2008 | Sep   | 18  | 14:02 | 44.040   | -3.408 | 7                | 9.690          | 0.7                       | 0.3                       | 0.2                       | 1.3                       | 43              |
| 2008 | Sep   | 18  | 15:02 | 44.351   | -3.552 | 4                | 9.140          | 0.4                       | 0.2                       | 0.0                       | 0.9                       | 0               |
| 2008 | Sep   | 18  | 16:03 | 44.663   | -3.700 | 5                | 13.410         | 0.4                       | 0.2                       | 0.0                       | 0.7                       | 20              |
| 2008 | Sep   | 18  | 17:01 | 44.963   | -3.841 | 5                | 13.410         | 0.4                       | 0.2                       | 0.0                       | 0.7                       | 40              |
| 2008 | Sep   | 18  | 18:00 | 45.263   | -3.987 | 17               | 10.970         | 1.5                       | 0.4                       | 0.8                       | 2.3                       | 12              |
| 2008 | Sep   | 18  | 19:02 | 45.579   | -4.143 | 18               | 9.140          | 2.0                       | 0.5                       | 1.0                       | 2.9                       | 22              |
| 2008 | Sep   | 18  | 20:03 | 45.900   | -4.297 | 6                | 1.858          | 3.2                       | 1.3                       | 0.6                       | 5.9                       | 0               |
| 2008 | Sep   | 18  | 21:03 | 46.209   | -4.445 | 2                | 1.858          | 1.1                       | 0.8                       | 0.0                       | 2.6                       |                 |
| 2008 | Sep   | 18  | 22:02 | 46.505   | -4.592 | 39               | 1.858          | 21.0                      | 3.4                       | 14.3                      | 27.7                      | 0               |
| 2008 | Sep   | 18  | 23:04 | 46.826   | -4.766 | 24               | 1.858          | 12.9                      | 2.6                       | 7.6                       | 18.2                      | 0               |
| 2008 | Sep   | 18  | 23:59 | 47.112   | -4.902 | 13               | 0.752          | 17.3                      | 4.8                       | 7.7                       | 26.9                      | 0               |
| 2008 | Sep   | 19  | 1:01  | 47.446   | -5.061 | 20               | 1.579          | 12.7                      | 2.8                       | 7.0                       | 18.3                      | 0               |
| 2008 | Sep   | 19  | 2:01  | 47.771   | -5.211 | 31               | 1.951          | 15.9                      | 2.9                       | 10.2                      | 21.6                      | 0               |
| 2008 | Sep   | 19  | 3:00  | 48.101   | -5.373 | 51               | 1.858          | 27.5                      | 3.8                       | 19.8                      | 35.1                      | 0               |
| 2008 | Sep   | 19  | 4:05  | 48.478   | -5.414 | 65               | 1.858          | 35.0                      | 4.3                       | 26.3                      | 43.7                      | 0               |
| 2008 | Sep   | 19  | 4:59  | 48.722   | -5.092 | 50               | 1.858          | 26.9                      | 3.8                       | 19.3                      | 34.5                      | 0               |
| 2008 | Sep   | 19  | 6:02  | 48.941   | -4.609 | 26               | 1.579          | 16.5                      | 3.2                       | 10.0                      | 22.9                      | 0               |
| 2008 | Sep   | 19  | 7:02  | 49.165   | -4.176 | 28               | 1.858          | 15.1                      | 2.8                       | 9.4                       | 20.8                      | 7               |
| 2008 | Sep   | 19  | 8:02  | 49.389   | -3.747 | 15               | 1.393          | 10.8                      | 2.8                       | 5.2                       | 16.3                      | 0               |
| 2008 | Sep   | 19  | 9:03  | 49.619   | -3.305 | 19               | 1.579          | 12.0                      | 2.8                       | 6.5                       | 17.6                      | 26              |
| 2008 | Sep   | 19  | 10:02 | 49.810   | -2.857 | 48               | 1.951          | 24.6                      | 3.6                       | 17.5                      | 31.7                      | 0               |
| 2008 | Sep   | 19  | 11:06 | 49.982   | -2.319 | 48               | 1.393          | 34.4                      | 5.0                       | 24.5                      | 44.4                      | 46              |
| 2008 | Sep   | 19  | 12:06 | 50.228   | -1.919 | 33               | 1.393          | 23.7                      | 4.1                       | 15.4                      | 31.9                      | 64              |
| 2008 | Sep   | 19  | 13:07 | 50.399   | -1.438 | 31               | 1.208          | 25.7                      | 4.6                       | 16.4                      | 34.9                      | 45              |

Table S2 – October 2008

| DATE |       |     |       | LOCATION |        | COCCOLITHOPHORES |           |                           |                           |                           |                           |                 |
|------|-------|-----|-------|----------|--------|------------------|-----------|---------------------------|---------------------------|---------------------------|---------------------------|-----------------|
| year | month | day | time  | lat      | lon    | number           | volume    | concentration             | standard                  | 95% confidence interval   |                           | % overcalcified |
|      |       |     | (UTC) | (°N)     | (°E)   | counted          | counted   | mean                      | error                     | lower                     | upper                     |                 |
|      |       |     |       |          |        | (cells)          | (mLitres) | (cells mL <sup>-1</sup> ) | (%)             |
| 2008 | Oct   | 17  | 11:18 | 43.480   | -3.123 | 9                | 1.622     | 5.55                      | 1.8                       | 1.8                       | 9.2                       | 11              |
| 2008 | Oct   | 17  | 12:19 | 43.795   | -3.250 | 1                | 1.920     | 0.52                      | 0.5                       | 0.0                       | 1.6                       |                 |
| 2008 | Oct   | 17  | 14:21 | 44.416   | -3.563 | 3                | 9.970     | 0.30                      | 0.2                       | 0.0                       | 0.6                       |                 |
| 2008 | Oct   | 17  | 15:15 | 44.686   | -3.704 | 3                | 11.856    | 0.25                      | 0.1                       | 0.0                       | 0.5                       |                 |
| 2008 | Oct   | 17  | 16:19 | 45.005   | -3.879 | 2                | 11.856    | 0.17                      | 0.1                       | 0.0                       | 0.4                       |                 |
| 2008 | Oct   | 17  | 17:16 | 45.289   | -4.033 | 17               | 17.710    | 0.96                      | 0.2                       | 0.5                       | 1.4                       | 12              |
| 2008 | Oct   | 17  | 18:18 | 45.610   | -4.206 | 11               | 17.448    | 0.63                      | 0.2                       | 0.3                       | 1.0                       | 27              |
| 2008 | Oct   | 17  | 19:17 | 45.912   | -4.375 | 8                | 18.693    | 0.43                      | 0.2                       | 0.1                       | 0.7                       | 25              |
| 2008 | Oct   | 17  | 20:18 | 46.217   | -4.542 | 1                | 3.201     | 0.31                      | 0.3                       | 0.0                       | 0.9                       |                 |
| 2008 | Oct   | 17  | 21:18 | 46.521   | -4.684 | 4                | 4.268     | 0.94                      | 0.5                       | 0.0                       | 1.9                       | 0               |
| 2008 | Oct   | 17  | 22:15 | 46.818   | -4.817 | 5                | 2.987     | 1.67                      | 0.7                       | 0.2                       | 3.2                       | 0               |
| 2008 | Oct   | 17  | 23:15 | 47.128   | -4.944 | 2                | 2.134     | 0.94                      | 0.7                       | 0.0                       | 2.3                       |                 |
| 2008 | Oct   | 18  | 0:23  | 47.481   | -5.085 | 6                | 2.080     | 2.88                      | 1.2                       | 0.5                       | 5.2                       | 0               |
| 2008 | Oct   | 18  | 1:21  | 47.782   | -5.242 | 74               | 2.134     | 34.68                     | 4.0                       | 26.6                      | 42.7                      | 7               |
| 2008 | Oct   | 18  | 2:19  | 48.109   | -5.358 | 20               | 1.115     | 17.94                     | 4.0                       | 9.9                       | 26.0                      | 10              |
| 2008 | Oct   | 18  | 3:22  | 48.473   | -5.401 | 61               | 2.561     | 23.82                     | 3.1                       | 17.7                      | 29.9                      | 5               |
| 2008 | Oct   | 18  | 4:18  | 48.727   | -5.084 | 20               | 0.929     | 21.53                     | 4.8                       | 11.9                      | 31.2                      | 0               |
| 2008 | Oct   | 18  | 5:19  | 48.953   | -4.634 | 10               | 0.929     | 10.76                     | 3.4                       | 4.0                       | 17.6                      | 0               |
| 2008 | Oct   | 18  | 6:18  | 49.180   | -4.204 | 27               | 2.774     | 9.73                      | 1.9                       | 6.0                       | 13.5                      | 11              |
| 2008 | Oct   | 18  | 7:18  | 49.395   | -3.789 | 3                | 1.301     | 2.31                      | 1.3                       | 0.0                       | 5.0                       |                 |
| 2008 | Oct   | 18  | 8:16  | 49.598   | -3.404 | 9                | 1.393     | 6.46                      | 2.2                       | 2.2                       | 10.8                      | 0               |
| 2008 | Oct   | 18  | 9:16  | 49.800   | -2.990 | 20               | 2.774     | 7.21                      | 1.6                       | 4.0                       | 10.4                      | 10              |
| 2008 | Oct   | 18  | 10:15 | 49.926   | -2.513 | 2                | 1.115     | 1.79                      | 1.3                       | 0.0                       | 4.3                       |                 |
| 2008 | Oct   | 18  | 11:27 | 50.121   | -1.943 | 2                | 2.561     | 0.78                      | 0.6                       | 0.0                       | 1.9                       |                 |
| 2008 | Oct   | 18  | 12:22 | 50.297   | -1.555 | 2                | 0.929     | 2.15                      | 1.5                       | 0.0                       | 5.2                       |                 |

Table S3 – November 2008

| DATE |       |     |       | LOCATION |        | COCCOLITHOPHORES |           |                           |                           |                           |                           |                 |
|------|-------|-----|-------|----------|--------|------------------|-----------|---------------------------|---------------------------|---------------------------|---------------------------|-----------------|
| year | month | day | time  | lat      | lon    | number           | volume    | concentration             | standard                  | 95% confidence interval   |                           | % overcalcified |
|      |       |     | (UTC) | (°N)     | (°E)   | counted          | counted   | mean                      | error                     | lower                     | upper                     |                 |
|      |       |     |       |          |        | (cells)          | (mLitres) | (cells mL <sup>-1</sup> ) | (%)             |
| 2008 | Nov   | 14  | 13:24 | 43.859   | -3.298 | 2                | 1.115     | 1.8                       | 1.3                       | 0.0                       | 4.3                       |                 |
| 2008 | Nov   | 14  | 14:17 | 44.130   | -3.427 | 6                | 5.760     | 1.0                       | 0.4                       | 0.2                       | 1.9                       | 50              |
| 2008 | Nov   | 14  | 15:19 | 44.446   | -3.590 | 7                | 9.600     | 0.7                       | 0.3                       | 0.2                       | 1.3                       | 29              |
| 2008 | Nov   | 14  | 16:19 | 44.746   | -3.741 | 5                | 11.520    | 0.4                       | 0.2                       | 0.0                       | 0.8                       | 20              |
| 2008 | Nov   | 14  | 17:17 | 45.035   | -3.889 | 3                | 11.520    | 0.3                       | 0.2                       | 0.0                       | 0.6                       |                 |
| 2008 | Nov   | 14  | 18:16 | 45.333   | -4.049 | 3                | 11.520    | 0.3                       | 0.2                       | 0.0                       | 0.6                       |                 |
| 2008 | Nov   | 14  | 19:17 | 45.636   | -4.218 | 1                | 11.520    | 0.1                       | 0.1                       | 0.0                       | 0.3                       |                 |
| 2008 | Nov   | 14  | 20:20 | 45.960   | -4.383 | 5                | 13.450    | 0.4                       | 0.2                       | 0.0                       | 0.7                       | 100             |
| 2008 | Nov   | 14  | 21:17 | 46.251   | -4.518 | 3                | 2.787     | 1.1                       | 0.6                       | 0.0                       | 2.3                       |                 |
| 2008 | Nov   | 14  | 22:18 | 46.569   | -4.664 | 3                | 2.601     | 1.2                       | 0.7                       | 0.0                       | 2.5                       |                 |
| 2008 | Nov   | 14  | 23:20 | 46.901   | -4.819 | 6                | 2.787     | 2.2                       | 0.9                       | 0.4                       | 3.9                       | 0               |
| 2008 | Nov   | 15  | 0:20  | 47.219   | -4.963 | 8                | 2.415     | 3.3                       | 1.2                       | 1.0                       | 5.7                       | 75              |
| 2008 | Nov   | 15  | 1:16  | 47.520   | -5.104 | 5                | 2.415     | 2.1                       | 0.9                       | 0.2                       | 3.9                       | 40              |
| 2008 | Nov   | 15  | 2:18  | 47.858   | -5.268 | 15               | 2.415     | 6.2                       | 1.6                       | 3.0                       | 9.4                       | 80              |
| 2008 | Nov   | 15  | 3:22  | 48.216   | -5.426 | 7                | 2.601     | 2.7                       | 1.0                       | 0.7                       | 4.7                       | 0               |
| 2008 | Nov   | 15  | 4:15  | 48.528   | -5.375 | 6                | 2.601     | 2.3                       | 0.9                       | 0.4                       | 4.2                       | 0               |
| 2008 | Nov   | 15  | 5:16  | 48.788   | -4.959 | 12               | 2.322     | 5.2                       | 1.5                       | 2.2                       | 8.2                       | 25              |
| 2008 | Nov   | 15  | 6:18  | 49.010   | -4.502 | 11               | 2.601     | 4.2                       | 1.3                       | 1.7                       | 6.8                       | 36              |
| 2008 | Nov   | 15  | 7:18  | 49.228   | -4.074 | 13               | 2.601     | 5.0                       | 1.4                       | 2.2                       | 7.8                       | 61              |
| 2008 | Nov   | 15  | 8:19  | 49.449   | -3.647 | 0                | 2.601     | 0.0                       | 0.0                       | 0.0                       | 0.0                       |                 |
| 2008 | Nov   | 15  | 9:18  | 49.655   | -3.233 | 10               | 2.415     | 4.1                       | 1.3                       | 1.5                       | 6.8                       | 50              |
| 2008 | Nov   | 15  | 10:18 | 49.851   | -2.781 | 13               | 2.601     | 5.0                       | 1.4                       | 2.2                       | 7.8                       | 31              |
| 2008 | Nov   | 15  | 11:17 | 49.979   | -2.288 | 14               | 2.229     | 6.3                       | 1.7                       | 2.9                       | 9.6                       | 0               |
| 2008 | Nov   | 15  | 12:21 | 50.196   | -1.920 | 0                | 2.044     | 0.0                       | 0.0                       | 0.0                       | 0.0                       |                 |
| 2008 | Nov   | 15  | 13:21 | 50.356   | -1.537 | 11               | 2.973     | 3.7                       | 1.1                       | 1.5                       | 5.9                       | 45              |

Table S4 – December 2008

| DATE |       |     |       | LOCATION |        | COCCOLITHOPHORES |           |                           |                           |                           |                           |                 |
|------|-------|-----|-------|----------|--------|------------------|-----------|---------------------------|---------------------------|---------------------------|---------------------------|-----------------|
| year | month | day | time  | lat      | lon    | number           | volume    | concentration             | standard                  | 95% confidence interval   |                           | % overcalcified |
|      |       |     | (UTC) | (°N)     | (°E)   | counted          | counted   | mean                      | error                     | lower                     | upper                     |                 |
|      |       |     |       |          |        | (cells)          | (mLitres) | (cells mL <sup>-1</sup> ) | (%)             |
| 2008 | Dec   | 19  | 12:43 | 43.401   | -3.089 | 1                | 0.464     | 2.2                       | 2.2                       | 0.0                       | 6.5                       |                 |
| 2008 | Dec   | 19  | 13:33 | 43.637   | -3.187 | 2                | 1.858     | 1.1                       | 0.8                       | 0.0                       | 2.6                       |                 |
| 2008 | Dec   | 19  | 14:28 | 43.901   | -3.323 | 5                | 1.384     | 3.6                       | 1.6                       | 0.4                       | 6.8                       | 100             |
| 2008 | Dec   | 19  | 15:05 | 44.075   | -3.414 | 21               | 1.858     | 11.3                      | 2.5                       | 6.4                       | 16.2                      | 100             |
| 2008 | Dec   | 19  | 16:04 | 44.355   | -3.557 | 22               | 17.117    | 1.3                       | 0.3                       | 0.7                       | 1.8                       | 82              |
| 2008 | Dec   | 19  | 17:04 | 44.648   | -3.692 | 19               | 1.858     | 10.2                      | 2.3                       | 5.5                       | 14.9                      | 100             |
| 2008 | Dec   | 19  | 18:04 | 44.930   | -3.823 | 16               | 7.020     | 2.3                       | 0.6                       | 1.1                       | 3.4                       | 87              |
| 2008 | Dec   | 19  | 18:58 | 45.191   | -3.943 | 32               | 1.858     | 17.2                      | 3.0                       | 11.1                      | 23.3                      | 91              |
| 2008 | Dec   | 19  | 20:01 | 45.502   | -4.083 | 11               | 3.716     | 3.0                       | 0.9                       | 1.2                       | 4.7                       | 91              |
| 2008 | Dec   | 19  | 21:03 | 45.799   | -4.214 | 9                | 1.858     | 4.8                       | 1.6                       | 1.6                       | 8.1                       | 78              |
| 2008 | Dec   | 19  | 22:02 | 46.083   | -4.352 | 2                | 1.858     | 1.1                       | 0.8                       | 0.0                       | 2.6                       |                 |
| 2008 | Dec   | 19  | 23:04 | 46.378   | -4.492 | 8                | 1.858     | 4.3                       | 1.5                       | 1.3                       | 7.4                       | 50              |
| 2008 | Dec   | 20  | 0:04  | 46.660   | -4.638 | 12               | 3.716     | 3.2                       | 0.9                       | 1.4                       | 5.1                       | 92              |
| 2008 | Dec   | 20  | 1:05  | 46.947   | -4.794 | 5                | 1.858     | 2.7                       | 1.2                       | 0.3                       | 5.1                       | 60              |
| 2008 | Dec   | 20  | 2:03  | 47.224   | -4.934 | 2                | 1.858     | 1.1                       | 0.8                       | 0.0                       | 2.6                       |                 |
| 2008 | Dec   | 20  | 2:59  | 47.495   | -5.062 | 1                | 1.858     | 0.5                       | 0.5                       | 0.0                       | 1.6                       |                 |
| 2008 | Dec   | 20  | 4:03  | 47.810   | -5.205 | 4                | 1.858     | 2.2                       | 1.1                       | 0.0                       | 4.3                       | 100             |
| 2008 | Dec   | 20  | 6:01  | 48.392   | -5.456 | 3                | 1.858     | 1.6                       | 0.9                       | 0.0                       | 3.5                       |                 |
| 2008 | Dec   | 20  | 7:01  | 48.671   | -5.209 | 2                | 1.858     | 1.1                       | 0.8                       | 0.0                       | 2.6                       |                 |
| 2008 | Dec   | 20  | 8:04  | 48.892   | -4.779 | 2                | 1.858     | 1.1                       | 0.8                       | 0.0                       | 2.6                       |                 |
| 2008 | Dec   | 20  | 9:00  | 49.085   | -4.383 | 9                | 1.858     | 4.8                       | 1.6                       | 1.6                       | 8.1                       | 67              |
| 2008 | Dec   | 20  | 10:02 | 49.288   | -3.940 | 6                | 1.858     | 3.2                       | 1.3                       | 0.6                       | 5.9                       | 67              |
| 2008 | Dec   | 20  | 11:00 | 49.492   | -3.539 | 2                | 1.858     | 1.1                       | 0.8                       | 0.0                       | 2.6                       |                 |
| 2008 | Dec   | 20  | 12:01 | 49.687   | -3.087 | 1                | 1.858     | 0.5                       | 0.5                       | 0.0                       | 1.6                       |                 |
| 2008 | Dec   | 20  | 13:01 | 49.881   | -2.629 | 2                | 1.858     | 1.1                       | 0.8                       | 0.0                       | 2.6                       |                 |
| 2008 | Dec   | 20  | 13:59 | 50.042   | -2.134 | 0                | 1.858     | 0.0                       | 0.0                       | 0.0                       | 0.0                       |                 |
| 2008 | Dec   | 20  | 15:05 | 50.307   | -1.698 | 1                | 1.858     | 0.5                       | 0.5                       | 0.0                       | 1.6                       |                 |

Table S5 – February 2009

| DATE |       |     |       | LOCATION |        | COCCOLITHOPHORES  |                   |                           |                           |                           |                           |                 |
|------|-------|-----|-------|----------|--------|-------------------|-------------------|---------------------------|---------------------------|---------------------------|---------------------------|-----------------|
| year | month | day | time  | lat      | lon    | number<br>counted | volume<br>counted | concentration<br>mean     | standard<br>error         | 95% confidence interval   |                           | % overcalcified |
|      |       |     | (UTC) | (°N)     | (°E)   | (cells)           | (mLitres)         | (cells mL <sup>-1</sup> ) | (%)             |
| 2009 | Feb   | 19  | 11:03 | 48.455   | -5.433 | 6                 | 1.115             | 2.2                       | 1.0                       | 9.8                       | 5.4                       | 100             |
| 2009 | Feb   | 19  | 11:28 | 48.355   | -5.469 | 0                 | 0.929             | 0.0                       | 0.0                       | 0.0                       | 0.0                       |                 |
| 2009 | Feb   | 19  | 12:00 | 48.225   | -5.442 | 5                 | 0.929             | 5.4                       | 2.4                       | 0.6                       | 10.2                      | 100             |
| 2009 | Feb   | 19  | 12:29 | 48.112   | -5.379 | 4                 | 0.929             | 4.3                       | 2.2                       | 0.0                       | 8.6                       | 100             |
| 2009 | Feb   | 19  | 13:00 | 47.993   | -5.318 | 30                | 0.836             | 35.9                      | 6.6                       | 22.8                      | 49.0                      | 93              |
| 2009 | Feb   | 19  | 13:33 | 47.862   | -5.255 | 19                | 0.929             | 20.5                      | 4.7                       | 11.1                      | 29.8                      | 95              |
| 2009 | Feb   | 19  | 14:01 | 47.752   | -5.204 | 7                 | 0.464             | 15.1                      | 5.7                       | 3.7                       | 26.5                      | 86              |
| 2009 | Feb   | 19  | 14:33 | 47.629   | -5.139 | 10                | 0.929             | 10.8                      | 3.4                       | 4.0                       | 17.6                      | 100             |
| 2009 | Feb   | 19  | 15:12 | 47.476   | -5.063 | 3                 | 1.301             | 2.3                       | 1.3                       | 0.0                       | 5.0                       |                 |
| 2009 | Feb   | 20  | 12:11 | 43.461   | -3.107 | 6                 | 0.650             | 9.2                       | 3.8                       | 1.7                       | 16.8                      | 83              |
| 2009 | Feb   | 20  | 13:12 | 43.784   | -3.254 | 27                | 0.929             | 29.1                      | 5.6                       | 17.9                      | 40.3                      | 93              |
| 2009 | Feb   | 20  | 14:08 | 44.078   | -3.396 | 19                | 0.929             | 20.5                      | 4.7                       | 11.1                      | 29.8                      | 100             |
| 2009 | Feb   | 20  | 15:04 | 44.366   | -3.541 | 24                | 0.929             | 25.8                      | 5.3                       | 15.3                      | 36.4                      | 96              |
| 2009 | Feb   | 20  | 16:01 | 44.657   | -3.690 | 51                | 1.858             | 27.5                      | 3.8                       | 19.8                      | 35.1                      | 96              |
| 2009 | Feb   | 20  | 17:00 | 44.961   | -3.831 | 35                | 1.858             | 18.8                      | 3.2                       | 12.5                      | 25.2                      | 97              |
| 2009 | Feb   | 20  | 17:59 | 45.259   | -3.979 | 45                | 1.858             | 24.2                      | 3.6                       | 17.0                      | 31.4                      | 98              |
| 2009 | Feb   | 20  | 18:57 | 45.548   | -4.127 | 42                | 1.858             | 22.6                      | 3.5                       | 15.6                      | 29.6                      | 98              |
| 2009 | Feb   | 20  | 20:05 | 45.896   | -4.287 | 38                | 1.858             | 20.5                      | 3.3                       | 13.8                      | 27.1                      | 92              |
| 2009 | Feb   | 20  | 21:02 | 46.194   | -4.438 | 11                | 1.858             | 5.9                       | 1.8                       | 2.4                       | 9.5                       | 100             |
| 2009 | Feb   | 20  | 22:02 | 46.500   | -4.590 | 32                | 1.858             | 17.2                      | 3.0                       | 11.1                      | 23.3                      | 91              |
| 2009 | Feb   | 20  | 23:03 | 46.811   | -4.735 | 29                | 1.858             | 15.6                      | 2.9                       | 9.8                       | 21.4                      | 97              |
| 2009 | Feb   | 21  | 0:06  | 47.144   | -4.863 | 29                | 1.858             | 15.6                      | 2.9                       | 9.8                       | 21.4                      | 86              |
| 2009 | Feb   | 21  | 1:09  | 47.455   | -5.048 | 7                 | 0.929             | 7.5                       | 2.8                       | 1.8                       | 13.2                      | 100             |
| 2009 | Feb   | 21  | 1:32  | 47.573   | -5.110 | 3                 | 0.929             | 3.2                       | 1.9                       | 0.0                       | 7.0                       |                 |
| 2009 | Feb   | 21  | 2:01  | 47.725   | -5.190 | 4                 | 0.929             | 4.3                       | 2.2                       | 0.0                       | 8.6                       | 75              |
| 2009 | Feb   | 21  | 2:34  | 47.892   | -5.279 | 19                | 0.929             | 20.5                      | 4.7                       | 11.1                      | 29.8                      | 84              |
| 2009 | Feb   | 21  | 3:04  | 48.044   | -5.351 | 15                | 0.929             | 16.1                      | 4.2                       | 7.8                       | 24.5                      | 73              |
| 2009 | Feb   | 21  | 3:33  | 48.197   | -5.422 | 16                | 0.650             | 24.6                      | 6.2                       | 12.3                      | 36.9                      | 87              |
| 2009 | Feb   | 21  | 4:05  | 48.369   | -5.428 | 5                 | 1.301             | 3.8                       | 1.7                       | 0.4                       | 7.3                       | 100             |
| 2009 | Feb   | 21  | 5:02  | 48.635   | -5.244 | 3                 | 1.301             | 2.3                       | 1.3                       | 0.0                       | 5.0                       |                 |
| 2009 | Feb   | 21  | 6:02  | 48.839   | -4.872 | 6                 | 1.486             | 4.0                       | 1.6                       | 0.7                       | 7.3                       | 83              |
| 2009 | Feb   | 21  | 6:59  | 49.036   | -4.522 | 9                 | 1.672             | 5.4                       | 1.8                       | 1.8                       | 9.0                       | 100             |
| 2009 | Feb   | 21  | 8:04  | 49.256   | -4.100 | 1                 | 1.672             | 0.6                       | 0.6                       | 0.0                       | 1.8                       |                 |
| 2009 | Feb   | 21  | 9:02  | 49.432   | -3.713 | 1                 | 1.858             | 0.5                       | 0.5                       | 0.0                       | 1.6                       |                 |

|      |     |    |       |        |        |   |       |     |     |     |     |  |
|------|-----|----|-------|--------|--------|---|-------|-----|-----|-----|-----|--|
| 2009 | Feb | 21 | 10:01 | 49.637 | -3.338 | 3 | 1.858 | 1.6 | 0.9 | 0.0 | 3.5 |  |
| 2009 | Feb | 21 | 11:02 | 49.803 | -2.912 | 2 | 1.672 | 1.2 | 0.8 | 0.0 | 2.9 |  |
| 2009 | Feb | 21 | 12:07 | 49.932 | -2.427 | 2 | 1.672 | 1.2 | 0.8 | 0.0 | 2.9 |  |
| 2009 | Feb | 21 | 13:05 | 50.098 | -2.042 | 2 | 1.672 | 1.2 | 0.8 | 0.0 | 2.9 |  |

Table S6 – March 2009

| DATE |       |     |       | LOCATION |        | COCCOLITHOPHORES  |                   |                           |                           |                           |                           |                 |
|------|-------|-----|-------|----------|--------|-------------------|-------------------|---------------------------|---------------------------|---------------------------|---------------------------|-----------------|
| year | month | day | time  | lat      | lon    | number<br>counted | volume<br>counted | concentration<br>mean     | standard<br>error         | 95% confidence interval   |                           | % overcalcified |
|      |       |     | (UTC) | (°N)     | (°E)   | (cells)           | (mLitres)         | (cells mL <sup>-1</sup> ) | (%)             |
| 2009 | Mar   | 23  | 11:12 | 48.403   | -5.416 | 9                 | 0.913             | 9.9                       | 3.3                       | 3.3                       | 16.4                      | 67              |
| 2009 | Mar   | 23  | 13:08 | 43.679   | -3.140 | 383               | 0.925             | 414.0                     | 21.2                      | 371.7                     | 456.4                     | 58              |
| 2009 | Mar   | 23  | 14:05 | 43.980   | -3.290 | 110               | 0.900             | 122.2                     | 11.7                      | 98.9                      | 145.5                     | 53              |
| 2009 | Mar   | 23  | 15:03 | 44.292   | -3.448 | 307               | 0.244             | 1260.0                    | 71.9                      | 1116.2                    | 1403.8                    | 71              |
| 2009 | Mar   | 23  | 15:03 | 44.292   | -3.448 | 315               | 0.256             | 1230.3                    | 69.3                      | 1091.7                    | 1368.9                    | 74              |
| 2009 | Mar   | 23  | 16:00 | 44.595   | -3.607 | 326               | 0.660             | 494.0                     | 27.4                      | 439.3                     | 548.7                     | 86              |
| 2009 | Mar   | 23  | 17:02 | 44.905   | -3.772 | 305               | 0.798             | 382.3                     | 21.9                      | 338.5                     | 426.1                     | 88              |
| 2009 | Mar   | 23  | 18:01 | 45.207   | -3.929 | 312               | 1.350             | 231.0                     | 13.1                      | 204.9                     | 257.2                     | 75              |
| 2009 | Mar   | 23  | 19:02 | 45.522   | -4.083 | 311               | 1.015             | 306.5                     | 17.4                      | 271.7                     | 341.3                     | 94              |
| 2009 | Mar   | 23  | 20:15 | 45.893   | -4.265 | 167               | 1.208             | 138.3                     | 10.7                      | 116.9                     | 159.7                     | 97              |
| 2009 | Mar   | 23  | 21:12 | 46.186   | -4.416 | 164               | 1.278             | 128.4                     | 10.0                      | 108.3                     | 148.4                     | 96              |
| 2009 | Mar   | 23  | 22:08 | 46.473   | -4.555 | 107               | 1.192             | 89.8                      | 8.7                       | 72.4                      | 107.1                     | 98              |
| 2009 | Mar   | 23  | 23:08 | 46.774   | -4.693 | 209               | 1.203             | 173.8                     | 12.0                      | 149.8                     | 197.8                     | 95              |
| 2009 | Mar   | 24  | 0:05  | 47.052   | -4.851 | 109               | 0.991             | 110.0                     | 10.5                      | 88.9                      | 131.0                     | 93              |
| 2009 | Mar   | 24  | 1:05  | 47.358   | -4.973 | 88                | 0.925             | 95.1                      | 10.1                      | 74.8                      | 115.4                     | 94              |
| 2009 | Mar   | 24  | 2:06  | 47.653   | -5.154 | 16                | 0.921             | 17.4                      | 4.3                       | 8.7                       | 26.1                      | 19              |
| 2009 | Mar   | 24  | 3:06  | 47.938   | -5.306 | 8                 | 0.917             | 8.7                       | 3.1                       | 2.6                       | 14.9                      | 62              |
| 2009 | Mar   | 24  | 4:02  | 48.213   | -5.385 | 25                | 1.110             | 22.5                      | 4.5                       | 13.5                      | 31.5                      | 60              |
| 2009 | Mar   | 24  | 5:03  | 48.515   | -5.415 | 56                | 1.070             | 52.3                      | 7.0                       | 38.3                      | 66.3                      | 43              |
| 2009 | Mar   | 24  | 6:01  | 48.721   | -5.089 | 20                | 1.375             | 14.5                      | 3.3                       | 8.0                       | 21.0                      | 95              |
| 2009 | Mar   | 24  | 7:00  | 48.913   | -4.730 | 10                | 1.381             | 7.2                       | 2.3                       | 2.7                       | 11.8                      | 50              |
| 2009 | Mar   | 24  | 8:08  | 49.113   | -4.346 | 4                 | 1.388             | 2.9                       | 1.4                       | 0.0                       | 5.8                       | 100             |
| 2009 | Mar   | 24  | 9:02  | 49.280   | -4.031 | 1                 | 1.301             | 0.8                       | 0.8                       | 0.0                       | 2.3                       |                 |
| 2009 | Mar   | 24  | 10:02 | 49.461   | -3.664 | 9                 | 1.301             | 6.9                       | 2.3                       | 2.3                       | 11.5                      | 89              |
| 2009 | Mar   | 24  | 11:03 | 49.637   | -3.277 | 1                 | 1.295             | 0.8                       | 0.8                       | 0.0                       | 2.3                       |                 |
| 2009 | Mar   | 24  | 12:05 | 49.822   | -2.871 | 18                | 1.375             | 13.1                      | 3.1                       | 6.9                       | 19.3                      | 44              |
| 2009 | Mar   | 24  | 13:08 | 49.933   | -2.428 | 5                 | 1.369             | 3.7                       | 1.6                       | 0.4                       | 6.9                       | 100             |
| 2009 | Mar   | 24  | 14:04 | 50.083   | -2.064 | 2                 | 1.203             | 1.7                       | 1.2                       | 0.0                       | 4.0                       |                 |
| 2009 | Mar   | 24  | 15:01 | 50.274   | -1.720 | 4                 | 1.008             | 4.0                       | 2.0                       | 0.0                       | 7.9                       | 0               |
| 2009 | Mar   | 24  | 16:04 | 50.456   | -1.286 | 0                 | 0.913             | 0.0                       | 0.0                       | 0.0                       | 0.0                       |                 |



Table S7 – April 2009

| DATE |       |     |       | LOCATION |        | COCCOLITHOPHORES |           |                           |                           |                           |                           |                 |
|------|-------|-----|-------|----------|--------|------------------|-----------|---------------------------|---------------------------|---------------------------|---------------------------|-----------------|
| year | month | day | time  | lat      | lon    | number           | volume    | concentration             | standard                  | 95% confidence interval   |                           | % overcalcified |
|      |       |     | (UTC) | (°N)     | (°E)   | counted          | counted   | mean                      | error                     | lower                     | upper                     |                 |
|      |       |     |       |          |        | (cells)          | (mLitres) | (cells mL <sup>-1</sup> ) | (%)             |
| 2009 | Apr   | 19  | 9:36  | 48.311   | -5.407 | 35               | 0.733     | 47.7                      | 8.1                       | 31.6                      | 63.9                      | 0               |
| 2009 | Apr   | 20  | 13:00 | 43.973   | -3.345 | 250              | 0.925     | 270.3                     | 17.1                      | 236.1                     | 304.4                     | 4               |
| 2009 | Apr   | 20  | 14:03 | 44.292   | -3.507 | 303              | 0.925     | 327.6                     | 18.8                      | 289.9                     | 365.2                     | 4               |
| 2009 | Apr   | 20  | 15:10 | 44.640   | -3.688 | 71               | 0.917     | 77.4                      | 9.2                       | 59.1                      | 95.8                      | 21              |
| 2009 | Apr   | 20  | 16:06 | 44.941   | -3.836 | 179              | 0.740     | 241.9                     | 18.1                      | 205.7                     | 278.0                     | 1               |
| 2009 | Apr   | 20  | 17:05 | 45.255   | -3.996 | 281              | 0.740     | 379.7                     | 22.7                      | 334.4                     | 425.0                     | 11              |
| 2009 | Apr   | 20  | 18:07 | 45.578   | -4.168 | 143              | 0.925     | 154.6                     | 12.9                      | 128.7                     | 180.4                     | 71              |
| 2009 | Apr   | 20  | 19:01 | 45.862   | -4.310 | 277              | 0.833     | 332.7                     | 20.0                      | 292.7                     | 372.7                     | 35              |
| 2009 | Apr   | 20  | 20:33 | 46.353   | -4.536 | 178              | 0.553     | 322.1                     | 24.1                      | 273.9                     | 370.4                     | 63              |
| 2009 | Apr   | 20  | 21:12 | 46.556   | -4.626 | 73               | 0.368     | 198.2                     | 23.2                      | 151.8                     | 244.6                     | 67              |
| 2009 | Apr   | 20  | 22:08 | 46.852   | -4.753 | 50               | 0.740     | 67.6                      | 9.6                       | 48.5                      | 86.7                      | 44              |
| 2009 | Apr   | 20  | 23:03 | 47.147   | -4.884 | 19               | 0.913     | 20.8                      | 4.8                       | 11.3                      | 30.4                      | 0               |
| 2009 | Apr   | 21  | 0:01  | 47.449   | -5.033 | 124              | 0.925     | 134.0                     | 12.0                      | 110.0                     | 158.1                     | 2               |
| 2009 | Apr   | 21  | 2:03  | 48.081   | -5.351 | 59               | 0.724     | 81.5                      | 10.6                      | 60.3                      | 102.8                     | 36              |
| 2009 | Apr   | 21  | 3:09  | 48.441   | -5.419 | 23               | 0.836     | 27.5                      | 5.7                       | 16.0                      | 39.0                      | 56              |
| 2009 | Apr   | 21  | 4:03  | 48.683   | -5.179 | 58               | 0.700     | 82.8                      | 10.9                      | 61.1                      | 104.6                     | 84              |
| 2009 | Apr   | 21  | 5:07  | 48.909   | -4.777 | 11               | 0.724     | 15.2                      | 4.6                       | 6.0                       | 24.4                      | 82              |
| 2009 | Apr   | 21  | 6:06  | 49.107   | -4.397 | 3                | 0.727     | 4.1                       | 2.4                       | 0.0                       | 8.9                       |                 |
| 2009 | Apr   | 21  | 10:04 | 49.786   | -2.895 | 0                | 0.909     | 0.0                       | 0.0                       | 0.0                       | 0.0                       |                 |
| 2009 | Apr   | 21  | 11:04 | 49.908   | -2.501 | 18               | 0.929     | 19.4                      | 4.6                       | 10.2                      | 28.5                      | 50              |
| 2009 | Apr   | 21  | 12:01 | 50.013   | -2.117 | 2                | 0.921     | 2.2                       | 1.5                       | 0.0                       | 5.2                       |                 |
| 2009 | Apr   | 21  | 13:00 | 50.195   | -1.736 | 3                | 1.105     | 2.7                       | 1.6                       | 0.0                       | 5.8                       |                 |
| 2009 | Apr   | 21  | 14:03 | 50.410   | -1.326 | 0                | 1.095     | 0.0                       | 0.0                       | 0.0                       | 0.0                       |                 |

Table S8 – May 2009

| DATE |       |     |       | LOCATION |        | COCCOLITHOPHORES |           |                           |                           |                           |                           |                 |
|------|-------|-----|-------|----------|--------|------------------|-----------|---------------------------|---------------------------|---------------------------|---------------------------|-----------------|
| year | month | day | time  | lat      | lon    | number           | volume    | concentration             | standard                  | 95% confidence interval   |                           | % overcalcified |
|      |       |     | (UTC) | (°N)     | (°E)   | counted          | counted   | mean                      | error                     | lower                     | upper                     |                 |
|      |       |     |       |          |        | (cells)          | (mLitres) | (cells mL <sup>-1</sup> ) | (%)             |
| 2009 | May   | 15  | 11:36 | 43.527   | -3.140 | 11               | 0.929     | 11.8                      | 3.6                       | 4.7                       | 19.0                      | 9               |
| 2009 | May   | 15  | 12:33 | 43.803   | -3.256 | 10               | 0.929     | 10.8                      | 3.4                       | 4.0                       | 17.6                      | 0               |
| 2009 | May   | 15  | 13:33 | 44.053   | -3.369 | 10               | 0.929     | 10.8                      | 3.4                       | 4.0                       | 17.6                      | 20              |
| 2009 | May   | 15  | 14:40 | 44.364   | -3.521 | 20               | 0.929     | 21.5                      | 4.8                       | 11.9                      | 31.2                      | 5               |
| 2009 | May   | 15  | 15:34 | 44.689   | -3.654 | 10               | 1.665     | 6.0                       | 1.9                       | 2.2                       | 9.8                       | 0               |
| 2009 | May   | 15  | 16:32 | 44.916   | -3.781 | 39               | 5.970     | 6.5                       | 1.0                       | 4.4                       | 8.6                       | 31              |
| 2009 | May   | 15  | 17:31 | 45.202   | -3.928 | 5                | 0.372     | 13.5                      | 6.0                       | 1.4                       | 25.5                      | 0               |
| 2009 | May   | 15  | 18:33 | 45.499   | -4.063 | 14               | 5.610     | 2.5                       | 0.7                       | 1.2                       | 3.8                       | 0               |
| 2009 | May   | 15  | 19:29 | 45.789   | -4.201 | 36               | 1.184     | 30.4                      | 5.1                       | 20.3                      | 40.5                      | 0               |
| 2009 | May   | 15  | 20:29 | 46.081   | -4.336 | 36               | 0.276     | 130.3                     | 21.7                      | 86.9                      | 173.7                     | 23              |
| 2009 | May   | 15  | 21:29 | 46.385   | -4.554 | 115              | 0.929     | 123.8                     | 11.5                      | 100.7                     | 146.8                     | 1               |
| 2009 | May   | 15  | 22:35 | 46.707   | -4.627 | 212              | 0.929     | 228.2                     | 15.7                      | 196.8                     | 259.5                     | 4               |
| 2009 | May   | 15  | 23:38 | 46.990   | -4.761 | 36               | 0.929     | 38.7                      | 6.5                       | 25.8                      | 51.7                      | 6               |
| 2009 | May   | 16  | 0:35  | 47.269   | -4.928 | 22               | 0.929     | 23.7                      | 5.0                       | 13.6                      | 33.8                      | 0               |
| 2009 | May   | 16  | 1:33  | 47.553   | -5.104 | 65               | 0.929     | 70.0                      | 8.7                       | 52.6                      | 87.3                      | 0               |
| 2009 | May   | 16  | 2:29  | 47.830   | -5.250 | 128              | 0.929     | 137.8                     | 12.2                      | 113.4                     | 162.1                     | 14              |
| 2009 | May   | 16  | 3:33  | 48.162   | -5.375 | 165              | 1.110     | 148.6                     | 11.6                      | 125.5                     | 171.8                     | 13              |
| 2009 | May   | 16  | 4:31  | 48.474   | -5.411 | 111              | 0.921     | 120.5                     | 11.4                      | 97.7                      | 143.4                     | 32              |
| 2009 | May   | 16  | 5:34  | 48.735   | -5.071 | 92               | 1.842     | 50.0                      | 5.2                       | 39.5                      | 60.4                      | 61              |
| 2009 | May   | 16  | 5:34  | 48.735   | -5.071 | 123              | 1.858     | 66.2                      | 6.0                       | 54.3                      | 78.1                      | 36              |
| 2009 | May   | 16  | 5:34  | 48.735   | -5.071 | 92               | 1.842     | 50.0                      | 5.2                       | 39.5                      | 60.4                      | 30              |
| 2009 | May   | 16  | 5:34  | 48.735   | -5.071 | 97               | 1.842     | 52.7                      | 5.3                       | 42.0                      | 63.4                      | 23              |
| 2009 | May   | 16  | 6:31  | 48.936   | -4.679 | 50               | 1.658     | 30.2                      | 4.3                       | 21.6                      | 38.7                      | 60              |
| 2009 | May   | 16  | 7:30  | 49.149   | -4.256 | 21               | 1.302     | 16.1                      | 3.5                       | 9.1                       | 23.2                      | 76              |
| 2009 | May   | 16  | 8:00  | 49.347   | -3.856 | 32               | 1.665     | 19.2                      | 3.4                       | 12.4                      | 26.0                      | 44              |
| 2009 | May   | 16  | 9:31  | 49.570   | -3.429 | 7                | 1.859     | 3.8                       | 1.4                       | 0.9                       | 6.6                       | 14              |
| 2009 | May   | 16  | 10:32 | 49.752   | -2.965 | 7                | 1.388     | 5.0                       | 1.9                       | 1.2                       | 8.9                       | 29              |
| 2009 | May   | 16  | 11:33 | 49.912   | -2.520 | 14               | 1.197     | 11.7                      | 3.1                       | 5.4                       | 17.9                      | 29              |
| 2009 | May   | 16  | 12:33 | 50.130   |        | 0                | 0.929     | 0.0                       | 0.0                       | 0.0                       | 0.0                       |                 |
| 2009 | May   | 16  | 13:37 | 50.318   | -1.590 | 0                | 0.925     | 0.0                       | 0.0                       | 0.0                       | 0.0                       |                 |
| 2009 | May   | 16  | 14:33 | 50.494   | -1.171 | 5                | 0.921     | 5.4                       | 2.4                       | 0.6                       | 10.3                      | 0               |

Table S9 – June 2009

| DATE |       |     |       | LOCATION |        | COCCOLITHOPHORES |           |                           |                           |                           |                           |                 |
|------|-------|-----|-------|----------|--------|------------------|-----------|---------------------------|---------------------------|---------------------------|---------------------------|-----------------|
| year | month | day | time  | lat      | lon    | number           | volume    | concentration             | standard                  | 95% confidence interval   |                           | % overcalcified |
|      |       |     | (UTC) | (°N)     | (°E)   | counted          | counted   | mean                      | error                     | lower                     | upper                     |                 |
|      |       |     |       |          |        | (cells)          | (mLitres) | (cells mL <sup>-1</sup> ) | (%)             |
| 2009 | June  | 18  | 12:18 | 43.567   | -3.182 | 33               | 1.205     | 27.4                      | 4.8                       | 17.9                      | 36.9                      | 0               |
| 2009 | June  | 18  | 13:22 | 43.903   | -3.281 | 1                | 1.205     | 0.8                       | 0.8                       | 0.0                       | 2.5                       |                 |
| 2009 | June  | 18  | 14:16 | 44.180   | -3.433 | 11               | 3.790     | 2.9                       | 0.9                       | 1.2                       | 4.7                       | 9               |
| 2009 | June  | 18  | 15:17 | 44.482   | -3.607 | 11               | 3.790     | 2.9                       | 0.9                       | 1.2                       | 4.7                       | 0               |
| 2009 | June  | 18  | 16:15 | 44.790   | -3.751 | 5                | 1.205     | 4.2                       | 1.9                       | 0.4                       | 7.9                       | 0               |
| 2009 | June  | 18  | 17:17 | 45.113   | -3.915 | 8                | 4.540     | 1.8                       | 0.6                       | 0.5                       | 3.0                       | 0               |
| 2009 | June  | 18  | 18:17 | 45.422   | -4.073 | 6                | 4.540     | 1.3                       | 0.5                       | 0.2                       | 2.4                       | 0               |
| 2009 | June  | 18  | 19:15 | 45.727   | -4.223 | 12               | 1.205     | 10.0                      | 2.9                       | 4.2                       | 15.7                      | 0               |
| 2009 | June  | 18  | 20:23 | 46.067   | -4.403 | 3                | 1.205     | 2.5                       | 1.4                       | 0.0                       | 5.4                       |                 |
| 2009 | June  | 18  | 21:18 | 46.341   | -4.546 | 6                | 1.205     | 5.0                       | 2.0                       | 0.9                       | 9.0                       | 0               |
| 2009 | June  | 18  | 22:22 | 46.661   | -4.707 | 0                | 1.205     | 0.0                       | 0.0                       | 0.0                       | 0.0                       |                 |
| 2009 | June  | 19  | 23:23 | 46.960   | -4.847 | 5                | 0.843     | 5.9                       | 2.7                       | 0.6                       | 11.2                      | 0               |
| 2009 | June  | 19  | 0:18  | 47.234   | -4.976 | 4                | 0.723     | 5.5                       | 2.8                       | 0.0                       | 11.1                      | 0               |
| 2009 | June  | 19  | 1:23  | 47.544   | -5.112 | 5                | 0.723     | 6.9                       | 3.1                       | 0.7                       | 13.1                      | 20              |
| 2009 | June  | 19  | 2:20  | 47.809   | -5.248 | 7                | 0.723     | 9.7                       | 3.7                       | 2.4                       | 17.0                      | 0               |
| 2009 | June  | 19  | 3:18  | 48.073   | -5.358 | 18               | 1.205     | 14.9                      | 3.5                       | 7.9                       | 22.0                      | 6               |
| 2009 | June  | 19  | 4:19  | 48.367   | -5.423 | 14               | 1.446     | 9.7                       | 2.6                       | 4.5                       | 14.9                      | 0               |
| 2009 | June  | 19  | 5:19  | 48.629   | -5.244 | 4                | 1.566     | 2.6                       | 1.3                       | 0.0                       | 5.1                       | 0               |
| 2009 | June  | 19  | 6:19  | 48.817   | -4.882 | 39               | 1.205     | 32.4                      | 5.2                       | 22.0                      | 42.7                      | 0               |
| 2009 | June  | 19  | 7:15  | 49.013   | -4.556 | 46               | 1.205     | 38.2                      | 5.6                       | 26.9                      | 49.4                      | 0               |
| 2009 | June  | 19  | 8:17  | 49.217   | -4.181 | 4                | 1.205     | 3.3                       | 1.7                       | 0.0                       | 6.6                       | 0               |
| 2009 | June  | 19  | 9:17  | 49.425   | -3.823 | 4                | 1.205     | 3.3                       | 1.7                       | 0.0                       | 6.6                       | 0               |
| 2009 | June  | 19  | 10:17 | 49.630   | -3.449 | 128              | 1.205     | 106.2                     | 9.4                       | 87.5                      | 125.0                     | 2               |
| 2009 | June  | 19  | 11:25 | 49.806   | -2.964 | 147              | 1.205     | 122.0                     | 10.1                      | 101.9                     | 142.1                     | 1               |
| 2009 | June  | 19  | 12:19 | 49.913   | -2.548 | 82               | 0.964     | 85.1                      | 9.4                       | 66.3                      | 103.9                     | 4               |
| 2009 | June  | 19  | 13:21 | 50.067   | -2.084 | 42               | 1.205     | 34.9                      | 5.4                       | 24.1                      | 45.6                      | 5               |
| 2009 | June  | 19  | 14:17 | 50.255   | -1.689 | 53               | 1.205     | 44.0                      | 6.0                       | 31.9                      | 56.1                      | 2               |
| 2009 | June  | 19  | 15:17 | 50.431   | -1.226 | 28               | 1.205     | 23.2                      | 4.4                       | 14.5                      | 32.0                      | 0               |

Table S10 – July 2009

| DATE |       |     |       | LOCATION |        | COCCOLITHOPHORES |           |                           |                           |                           |                           |                 |
|------|-------|-----|-------|----------|--------|------------------|-----------|---------------------------|---------------------------|---------------------------|---------------------------|-----------------|
| year | month | day | time  | lat      | lon    | number           | volume    | concentration             | standard                  | 95% confidence interval   |                           | % overcalcified |
|      |       |     | (UTC) | (°N)     | (°E)   | counted          | counted   | mean                      | error                     | lower                     | upper                     |                 |
|      |       |     |       |          |        | (cells)          | (mLitres) | (cells mL <sup>-1</sup> ) | (%)             |
| 2009 | July  | 15  | 12:36 | 43.605   | -3.166 | 1                | 0.921     | 1.1                       | 1.1                       | 0.0                       | 3.3                       |                 |
| 2009 | July  | 15  | 13:34 | 43.887   | -3.272 | 3                | 0.925     | 3.2                       | 1.9                       | 0.0                       | 7.0                       |                 |
| 2009 | July  | 15  | 14:34 | 44.170   | -3.405 | 5                | 3.500     | 1.4                       | 0.6                       | 0.2                       | 2.7                       | 0               |
| 2009 | July  | 15  | 15:31 | 44.447   | -3.506 | 4                | 3.450     | 1.2                       | 0.6                       | 0.0                       | 2.3                       | 25              |
| 2009 | July  | 15  | 16:31 | 44.737   | -3.625 | 9                | 3.500     | 2.6                       | 0.9                       | 0.9                       | 4.3                       | 0               |
| 2009 | July  | 15  | 17:30 | 45.030   | -3.750 | 7                | 0.929     | 7.5                       | 2.8                       | 1.8                       | 13.2                      | 0               |
| 2009 | July  | 15  | 18:30 | 45.322   | -3.895 | 8                | 3.510     | 2.3                       | 0.8                       | 0.7                       | 3.9                       | 0               |
| 2009 | July  | 15  | 19:36 | 45.633   | -4.079 | 2                | 1.790     | 1.1                       | 0.8                       | 0.0                       | 2.7                       |                 |
| 2009 | July  | 15  | 20:36 | 45.931   | -4.251 | 7                | 1.760     | 4.0                       | 1.5                       | 1.0                       | 7.0                       | 0               |
| 2009 | July  | 15  | 21:35 | 46.223   | -4.415 | 2                | 0.921     | 2.2                       | 1.5                       | 0.0                       | 5.2                       |                 |
| 2009 | July  | 15  | 22:36 | 46.526   | -4.574 | 4                | 0.929     | 4.3                       | 2.2                       | 0.0                       | 8.6                       | 0               |
| 2009 | July  | 15  | 23:37 | 46.828   | -4.751 | 10               | 0.925     | 10.8                      | 3.4                       | 4.0                       | 17.6                      | 0               |
| 2009 | July  | 16  | 0:33  | 47.109   | -4.912 | 21               | 0.929     | 22.6                      | 4.9                       | 12.7                      | 32.5                      | 0               |
| 2009 | July  | 16  | 1:32  | 47.405   | -5.075 | 14               | 0.925     | 15.1                      | 4.0                       | 7.0                       | 23.2                      | 0               |
| 2009 | July  | 16  | 2:38  | 47.744   | -5.256 | 2                | 0.925     | 2.2                       | 1.5                       | 0.0                       | 5.2                       |                 |
| 2009 | July  | 16  | 3:30  | 48.014   | -5.364 | 26               | 1.278     | 20.3                      | 4.0                       | 12.4                      | 28.3                      | 0               |
| 2009 | July  | 16  | 4:30  | 48.341   | -5.414 | 28               | 1.278     | 21.9                      | 4.1                       | 13.6                      | 30.2                      | 0               |
| 2009 | July  | 16  | 5:31  | 48.631   | -5.255 | 124              | 1.260     | 98.4                      | 8.8                       | 80.7                      | 116.1                     | 0               |
| 2009 | July  | 16  | 6:32  | 48.854   | -4.872 | 176              | 1.301     | 135.3                     | 10.2                      | 114.9                     | 155.7                     | 0               |
| 2009 | July  | 16  | 7:35  | 49.091   | -4.472 | 307              | 0.611     | 502.3                     | 28.7                      | 445.0                     | 559.6                     | 0               |
| 2009 | July  | 16  | 8:35  | 49.308   | -4.084 | 311              | 0.636     | 489.0                     | 27.7                      | 433.6                     | 544.5                     | 0               |
| 2009 | July  | 16  | 9:35  | 49.470   | -3.635 | 332              | 0.099     | 3349.8                    | 183.8                     | 2982.1                    | 3717.5                    | 0               |
| 2009 | July  | 16  | 10:35 | 49.687   | -3.231 | 168              | 0.929     | 180.8                     | 13.9                      | 152.9                     | 208.7                     | 0               |
| 2009 | July  | 16  | 11:39 | 49.881   | -2.768 | 87               | 0.892     | 97.5                      | 10.5                      | 76.6                      | 118.4                     | 3               |
| 2009 | July  | 16  | 12:35 | 49.979   | -2.291 | 10               | 0.917     | 10.9                      | 3.4                       | 4.0                       | 17.8                      | 30              |
| 2009 | July  | 16  | 13:35 | 50.194   | -1.855 | 44               | 0.925     | 47.6                      | 7.2                       | 33.2                      | 61.9                      | 14              |
| 2009 | July  | 16  | 14:32 | 50.408   | -1.454 | 13               | 0.925     | 14.1                      | 3.9                       | 6.3                       | 21.8                      | 0               |

Table S11 – August 2009

| DATE |       |     |       | LOCATION |        | COCCOLITHOPHORES |           |                           |                           |                           |                           |                 |
|------|-------|-----|-------|----------|--------|------------------|-----------|---------------------------|---------------------------|---------------------------|---------------------------|-----------------|
| year | month | day | time  | lat      | lon    | number           | volume    | concentration             | standard                  | 95% confidence interval   |                           | % overcalcified |
|      |       |     | (UTC) | (°N)     | (°E)   | counted          | counted   | mean                      | error                     | lower                     | upper                     |                 |
|      |       |     |       |          |        | (cells)          | (mLitres) | (cells mL <sup>-1</sup> ) | (%)             |
| 2009 | Aug   | 14  | 12:31 | 43.571   | -3.170 | 0                | 1.205     | 0.0                       | 0.0                       | 0.0                       | 0.0                       |                 |
| 2009 | Aug   | 14  | 13:33 | 43.876   | -3.322 | 1                | 1.446     | 0.7                       | 0.7                       | 0.0                       | 2.1                       |                 |
| 2009 | Aug   | 14  | 14:32 | 44.189   | -3.487 | 4                | 4.540     | 0.9                       | 0.4                       | 0.0                       | 1.8                       | 0               |
| 2009 | Aug   | 14  | 15:31 | 44.494   | -3.639 | 1                | 3.790     | 0.3                       | 0.3                       | 0.0                       | 0.8                       |                 |
| 2009 | Aug   | 14  | 16:32 | 44.813   | -3.761 | 0                | 4.650     | 0.0                       | 0.0                       | 0.0                       | 0.0                       |                 |
| 2009 | Aug   | 14  | 17:39 | 45.158   | -3.924 | 4                | 3.790     | 1.1                       | 0.5                       | 0.0                       | 2.1                       | 0               |
| 2009 | Aug   | 14  | 18:36 | 45.451   | -4.066 | 0                | 2.070     | 0.0                       | 0.0                       | 0.0                       | 0.0                       |                 |
| 2009 | Aug   | 14  | 19:28 | 45.720   | -4.198 | 4                | 3.790     | 1.1                       | 0.5                       | 0.0                       | 2.1                       | 75              |
| 2009 | Aug   | 14  | 20:34 | 46.062   | -4.369 | 14               | 1.205     | 11.6                      | 3.1                       | 5.4                       | 17.8                      | 14              |
| 2009 | Aug   | 14  | 21:33 | 46.369   | -4.515 | 23               | 1.205     | 19.1                      | 4.0                       | 11.1                      | 27.1                      | 0               |
| 2009 | Aug   | 14  | 22:32 | 46.674   | -4.676 | 55               | 1.205     | 45.7                      | 6.2                       | 33.3                      | 58.0                      | 0               |
| 2009 | Aug   | 14  | 23:30 | 46.965   | -4.827 | 58               | 1.446     | 40.1                      | 5.3                       | 29.6                      | 50.7                      | 9               |
| 2009 | Aug   | 15  | 0:33  | 47.285   | -4.993 | 87               | 1.279     | 68.0                      | 7.3                       | 53.4                      | 82.6                      | 0               |
| 2009 | Aug   | 15  | 1:33  | 47.591   | -5.172 | 22               | 1.446     | 15.2                      | 3.2                       | 8.7                       | 21.7                      | 0               |
| 2009 | Aug   | 15  | 2:29  | 47.879   | -5.332 | 54               | 1.446     | 37.4                      | 5.1                       | 27.2                      | 47.5                      | 50              |
| 2009 | Aug   | 15  | 3:29  | 48.192   | -5.414 | 30               | 1.446     | 20.8                      | 3.8                       | 13.2                      | 28.3                      | 10              |
| 2009 | Aug   | 15  | 4:30  | 48.510   | -5.382 | 12               | 1.205     | 10.0                      | 2.9                       | 4.2                       | 15.7                      | 0               |
| 2009 | Aug   | 15  | 5:30  | 48.736   | -5.034 | 57               | 1.205     | 47.3                      | 6.3                       | 34.8                      | 59.8                      | 12              |
| 2009 | Aug   | 15  | 6:31  | 48.939   | -4.628 | 21               | 1.205     | 17.4                      | 3.8                       | 9.8                       | 25.0                      | 9               |
| 2009 | Aug   | 15  | 7:33  | 49.158   | -4.222 | 23               | 1.205     | 19.1                      | 4.0                       | 11.1                      | 27.1                      | 22              |
| 2009 | Aug   | 15  | 8:33  | 49.371   | -3.825 | 12               | 1.205     | 10.0                      | 2.9                       | 4.2                       | 15.7                      | 0               |
| 2009 | Aug   | 15  | 9:33  | 49.577   | -3.402 | 19               | 1.205     | 15.8                      | 3.6                       | 8.5                       | 23.0                      | 0               |
| 2009 | Aug   | 15  | 10:33 | 49.803   | -3.019 | 70               | 1.205     | 58.1                      | 6.9                       | 44.2                      | 72.0                      | 1               |
| 2009 | Aug   | 15  | 11:33 | 49.919   | -2.526 | 6                | 1.205     | 5.0                       | 2.0                       | 0.9                       | 9.0                       | 67              |
| 2009 | Aug   | 15  | 12:29 | 50.093   | -2.095 | 5                | 1.446     | 3.5                       | 1.5                       | 0.4                       | 6.6                       | 0               |
| 2009 | Aug   | 15  | 13:31 | 50.312   | -1.649 | 27               | 1.566     | 17.2                      | 3.3                       | 10.6                      | 23.9                      | 18              |
| 2009 | Aug   | 15  | 14:34 | 50.509   | -1.142 | 34               | 1.205     | 28.2                      | 4.8                       | 18.5                      | 37.9                      | 21              |

Table S12 – September 2009

| DATE |       |     |          | LOCATION |        | COCCOLITHOPHORES |                |                           |                           |                           |                           |                 |
|------|-------|-----|----------|----------|--------|------------------|----------------|---------------------------|---------------------------|---------------------------|---------------------------|-----------------|
| year | month | day | time     | lat      | lon    | number counted   | volume counted | concentration mean        | standard error            | 95% confidence interval   |                           | % overcalcified |
|      |       |     | (UTC)    | (°N)     | (°E)   | (cells)          | (mLitres)      | (cells mL <sup>-1</sup> ) | (%)             |
| 2009 | Sep   | 16  | 12:31:00 | 43.581   | -3.154 | 0                | 1.205          | 0.0                       | 0.0                       | 0.0                       | 0.0                       |                 |
| 2009 | Sep   | 16  | 13:02:00 | 47.923   | -5.299 | 6                | 1.024          | 5.9                       | 2.4                       | 1.1                       | 10.6                      | 0               |
| 2009 | Sep   | 16  | 13:33:00 | 43.887   | -3.293 | 0                | 1.205          | 0.0                       | 0.0                       | 0.0                       | 0.0                       |                 |
| 2009 | Sep   | 16  | 14:35:00 | 44.215   | -3.450 | 2                | 1.205          | 1.7                       | 1.2                       | 0.0                       | 4.0                       |                 |
| 2009 | Sep   | 16  | 15:31:00 | 44.491   | -3.593 | 1                | 1.205          | 0.8                       | 0.8                       | 0.0                       | 2.5                       |                 |
| 2009 | Sep   | 16  | 16:30:00 | 44.799   | -3.750 | 0                | 1.205          | 0.0                       | 0.0                       | 0.0                       | 0.0                       |                 |
| 2009 | Sep   | 16  | 17:30:00 | 45.098   | -3.896 | 1                | 1.205          | 0.8                       | 0.8                       | 0.0                       | 2.5                       |                 |
| 2009 | Sep   | 16  | 18:30:00 | 45.359   | -4.071 | 1                | 1.205          | 0.8                       | 0.8                       | 0.0                       | 2.5                       |                 |
| 2009 | Sep   | 16  | 19:34:00 | 45.684   | -4.316 | 3                | 1.205          | 2.5                       | 1.4                       | 0.0                       | 5.4                       |                 |
| 2009 | Sep   | 16  | 20:34:00 | 45.966   | -4.517 | 1                | 1.205          | 0.8                       | 0.8                       | 0.0                       | 2.5                       |                 |
| 2009 | Sep   | 16  | 21:33:00 | 46.259   | -4.681 | 5                | 1.205          | 4.2                       | 1.9                       | 0.4                       | 7.9                       | 40              |
| 2009 | Sep   | 16  | 22:33:00 | 46.555   | -4.805 | 1                | 1.205          | 0.8                       | 0.8                       | 0.0                       | 2.5                       |                 |
| 2009 | Sep   | 16  | 23:32:00 | 46.860   | -4.900 | 1                | 1.205          | 0.8                       | 0.8                       | 0.0                       | 2.5                       |                 |
| 2009 | Sep   | 17  | 0:33:00  | 47.165   | -4.978 | 0                | 1.205          | 0.0                       | 0.0                       | 0.0                       | 0.0                       |                 |
| 2009 | Sep   | 17  | 1:35:00  | 47.459   | -5.079 | 20               | 1.205          | 16.6                      | 3.7                       | 9.2                       | 24.0                      | 40              |
| 2009 | Sep   | 17  | 2:31:00  | 47.732   | -5.263 | 12               | 1.205          | 10.0                      | 2.9                       | 4.2                       | 15.7                      | 25              |
| 2009 | Sep   | 17  | 3:31:00  | 48.009   | -5.396 | 13               | 1.205          | 10.8                      | 3.0                       | 4.8                       | 16.8                      | 0               |
| 2009 | Sep   | 17  | 4:30:00  | 48.389   | -5.416 | 9                | 1.205          | 7.5                       | 2.5                       | 2.5                       | 12.5                      | 44              |
| 2009 | Sep   | 17  | 5:31:00  | 48.597   | -5.314 | 15               | 1.205          | 12.5                      | 3.2                       | 6.0                       | 18.9                      | 47              |
| 2009 | Sep   | 17  | 6:29:00  | 48.769   | -5.000 | 4                | 1.205          | 3.3                       | 1.7                       | 0.0                       | 6.6                       | 0               |
| 2009 | Sep   | 17  | 7:34:00  | 48.958   | -4.654 | 8                | 1.205          | 6.6                       | 2.3                       | 1.9                       | 11.3                      | 50              |
| 2009 | Sep   | 17  | 9:02:00  | 49.124   | -4.326 | 16               | 1.205          | 13.3                      | 3.3                       | 6.6                       | 19.9                      | 19              |
| 2009 | Sep   | 17  | 9:34:00  | 49.301   | -4.002 | 36               | 1.205          | 29.9                      | 5.0                       | 19.9                      | 39.8                      | 47              |
| 2009 | Sep   | 17  | 10:33:00 | 49.470   | -3.670 | 8                | 1.205          | 6.6                       | 2.3                       | 1.9                       | 11.3                      | 38              |
| 2009 | Sep   | 17  | 11:31:00 | 49.535   | -3.495 | 33               | 1.205          | 27.4                      | 4.8                       | 17.9                      | 36.9                      | 39              |
| 2009 | Sep   | 17  | 12:36:00 | 49.768   | -2.943 | 17               | 1.205          | 14.1                      | 3.4                       | 7.3                       | 21.0                      | 12              |
| 2009 | Sep   | 17  | 13:35:00 | 49.890   | -2.575 | 12               | 1.205          | 10.0                      | 2.9                       | 4.2                       | 15.7                      | 58              |
| 2009 | Sep   | 17  | 14:37:00 | 50.050   | -2.216 | 26               | 1.205          | 21.6                      | 4.2                       | 13.1                      | 30.0                      | 38              |
| 2009 | Sep   | 17  | 15:32:00 | 50.225   | -1.901 | 6                | 1.205          | 5.0                       | 2.0                       | 0.9                       | 9.0                       | 83              |
| 2009 | Sep   | 17  | 16:32:00 | 50.376   | -1.463 | 22               | 1.205          | 18.3                      | 3.9                       | 10.5                      | 26.0                      | 36              |

Table S13 – October 2009

| DATE |       |     |          | LOCATION |        | COCCOLITHOPHORES |                |                           |                           |                           |                           |                 |
|------|-------|-----|----------|----------|--------|------------------|----------------|---------------------------|---------------------------|---------------------------|---------------------------|-----------------|
| year | month | day | time     | lat      | lon    | number counted   | volume counted | concentration mean        | standard error            | 95% confidence interval   |                           | % overcalcified |
|      |       |     | (UTC)    | (°N)     | (°E)   | (cells)          | (mLitres)      | (cells mL <sup>-1</sup> ) | (%)             |
| 2009 | Oct   | 16  | 12:07:00 | 43.676   | -3.216 | 6                | 1.205          | 5.0                       | 2.0                       | 0.9                       | 9.0                       | 50              |
| 2009 | Oct   | 16  | 13:05:00 | 43.979   | -3.351 | 2                | 1.205          | 1.7                       | 1.2                       | 0.0                       | 4.0                       |                 |
| 2009 | Oct   | 16  | 14:10:00 | 44.307   | -3.494 | 1                | 1.205          | 0.8                       | 0.8                       | 0.0                       | 2.5                       |                 |
| 2009 | Oct   | 16  | 15:04:00 | 44.595   | -3.635 | 2                | 1.205          | 1.7                       | 1.2                       | 0.0                       | 4.0                       |                 |
| 2009 | Oct   | 16  | 16:04:00 | 44.899   | -3.785 | 7                | 1.205          | 5.8                       | 2.2                       | 1.4                       | 10.2                      | 14              |
| 2009 | Oct   | 16  | 17:04:00 | 45.204   | -3.936 | 2                | 1.205          | 1.7                       | 1.2                       | 0.0                       | 4.0                       |                 |
| 2009 | Oct   | 16  | 18:05:00 | 45.513   | -4.096 | 5                | 1.205          | 4.2                       | 1.9                       | 0.4                       | 7.9                       | 40              |
| 2009 | Oct   | 16  | 19:01:00 | 45.799   | -4.224 | 4                | 1.205          | 3.3                       | 1.7                       | 0.0                       | 6.6                       | 25              |
| 2009 | Oct   | 16  | 20:00:00 | 46.100   | -4.374 | 2                | 1.205          | 1.7                       | 1.2                       | 0.0                       | 4.0                       |                 |
| 2009 | Oct   | 16  | 21:00:00 | 46.399   | -4.527 | 3                | 1.205          | 2.5                       | 1.4                       | 0.0                       | 5.4                       |                 |
| 2009 | Oct   | 16  | 22:00:00 | 46.701   | -4.665 | 2                | 1.205          | 1.7                       | 1.2                       | 0.0                       | 4.0                       |                 |
| 2009 | Oct   | 16  | 23:03:00 | 47.030   | -4.846 | 5                | 1.205          | 4.2                       | 1.9                       | 0.4                       | 7.9                       | 80              |
| 2009 | Oct   | 17  | 0:05:00  | 47.349   | -5.026 | 1                | 1.205          | 0.8                       | 0.8                       | 0.0                       | 2.5                       |                 |
| 2009 | Oct   | 17  | 1:04:00  | 47.661   | -5.167 | 11               | 1.205          | 9.1                       | 2.8                       | 3.6                       | 14.6                      | 64              |
| 2009 | Oct   | 17  | 2:06:00  | 47.983   | -5.313 | 46               | 1.205          | 38.2                      | 5.6                       | 26.9                      | 49.4                      | 76              |
| 2009 | Oct   | 17  | 3:04:00  | 48.327   | -5.394 | 147              | 1.205          | 122.0                     | 10.1                      | 101.9                     | 142.1                     | 78              |
| 2009 | Oct   | 17  | 4:04:00  | 48.642   | -5.247 | 35               | 1.205          | 29.1                      | 4.9                       | 19.2                      | 38.9                      | 63              |
| 2009 | Oct   | 17  | 5:04:00  | 48.854   | -4.838 | 12               | 1.205          | 10.0                      | 2.9                       | 4.2                       | 15.7                      | 83              |
| 2009 | Oct   | 17  | 6:05:00  | 49.064   | -4.449 | 62               | 1.205          | 51.5                      | 6.5                       | 38.4                      | 64.5                      | 68              |
| 2009 | Oct   | 17  | 7:01:00  | 49.256   | -4.098 | 38               | 1.205          | 31.5                      | 5.1                       | 21.3                      | 41.8                      | 66              |
| 2009 | Oct   | 17  | 8:00:00  | 49.458   | -3.738 | 5                | 1.205          | 4.2                       | 1.9                       | 0.4                       | 7.9                       | 60              |
| 2009 | Oct   | 17  | 9:02:00  | 49.672   | -3.366 | 3                | 1.205          | 2.5                       | 1.4                       | 0.0                       | 5.4                       |                 |
| 2009 | Oct   | 17  | 10:01:00 | 49.831   | -2.965 | 133              | 1.205          | 110.4                     | 9.6                       | 91.2                      | 129.5                     | 83              |
| 2009 | Oct   | 17  | 11:03:00 | 49.921   | -2.504 | 29               | 1.205          | 24.1                      | 4.5                       | 15.1                      | 33.0                      | 93              |
| 2009 | Oct   | 17  | 12:06:00 | 50.075   | -2.131 | 14               | 1.205          | 11.6                      | 3.1                       | 5.4                       | 17.8                      | 93              |
| 2009 | Oct   | 17  | 13:06:00 | 50.232   | -1.801 | 24               | 1.205          | 19.9                      | 4.1                       | 11.8                      | 28.1                      | 71              |
| 2009 | Oct   | 17  | 14:08:00 | 50.402   | -1.448 | 32               | 1.205          | 26.6                      | 4.7                       | 17.2                      | 36.0                      | 63              |
| 2009 | Oct   | 17  | 15:03:00 | 50.551   | -1.110 | 22               | 1.205          | 18.3                      | 3.9                       | 10.5                      | 26.0                      | 77              |

Table S14 – November 2009

| DATE |       |     |          | LOCATION |        | COCCOLITHOPHORES |                |                           |                           |                           |                           |                 |
|------|-------|-----|----------|----------|--------|------------------|----------------|---------------------------|---------------------------|---------------------------|---------------------------|-----------------|
| year | month | day | time     | lat      | lon    | number counted   | volume counted | concentration mean        | standard error            | 95% confidence interval   |                           | % overcalcified |
|      |       |     | (UTC)    | (°N)     | (°E)   | (cells)          | (mLitres)      | (cells mL <sup>-1</sup> ) | (%)             |
| 2009 | Nov   | 19  | 9:47:00  | 48.927   | -4.784 | 4                | 1.205          | 3.3                       | 1.7                       | 0.0                       | 6.6                       | 100             |
| 2009 | Nov   | 19  | 13:51:00 | 48.516   | -5.394 | 8                | 1.205          | 6.6                       | 2.3                       | 1.9                       | 11.3                      | 88              |
| 2009 | Nov   | 19  | 14:59:00 | 48.280   | -5.436 | 13               | 1.205          | 10.8                      | 3.0                       | 4.8                       | 16.8                      | 92              |
| 2009 | Nov   | 19  | 16:28:00 | 47.937   | -5.279 | 8                | 1.205          | 6.6                       | 2.3                       | 1.9                       | 11.3                      | 88              |
| 2009 | Nov   | 19  | 17:31:00 | 47.631   | -5.121 | 9                | 1.205          | 7.5                       | 2.5                       | 2.5                       | 12.5                      | 100             |
| 2009 | Nov   | 19  | 18:48:00 | 47.250   | -4.945 | 8                | 1.205          | 6.6                       | 2.3                       | 1.9                       | 11.3                      | 88              |
| 2009 | Nov   | 19  | 19:51:00 | 46.962   | -4.781 | 7                | 1.205          | 5.8                       | 2.2                       | 1.4                       | 10.2                      | 100             |
| 2009 | Nov   | 19  | 22:01:00 | 46.328   | -4.490 | 6                | 1.205          | 5.0                       | 2.0                       | 0.9                       | 9.0                       | 100             |
| 2009 | Nov   | 19  | 23:03:00 | 46.013   | -4.338 | 4                | 1.205          | 3.3                       | 1.7                       | 0.0                       | 6.6                       | 100             |
| 2009 | Nov   | 20  | 13:17:00 | 43.570   | -3.141 | 3                | 1.205          | 2.5                       | 1.4                       | 0.0                       | 5.4                       |                 |
| 2009 | Nov   | 20  | 14:19:00 | 43.878   | -3.280 | 11               | 1.205          | 9.1                       | 2.8                       | 3.6                       | 14.6                      | 100             |
| 2009 | Nov   | 20  | 15:19:00 | 44.172   | -3.417 | 10               | 1.205          | 8.3                       | 2.6                       | 3.1                       | 13.5                      | 100             |
| 2009 | Nov   | 20  | 16:18:00 | 44.464   | -3.548 | 14               | 1.205          | 11.6                      | 3.1                       | 5.4                       | 17.8                      | 86              |
| 2009 | Nov   | 20  | 17:14:00 | 44.733   | -3.677 | 0                | 1.205          | 0.0                       | 0.0                       | 0.0                       | 0.0                       |                 |
| 2009 | Nov   | 20  | 18:15:00 | 45.033   | -3.805 | 4                | 1.205          | 3.3                       | 1.7                       | 0.0                       | 6.6                       | 100             |
| 2009 | Nov   | 20  | 19:15:00 | 45.324   | -3.952 | 9                | 1.205          | 7.5                       | 2.5                       | 2.5                       | 12.5                      | 100             |
| 2009 | Nov   | 20  | 20:13:00 | 45.609   | -4.101 | 12               | 1.205          | 10.0                      | 2.9                       | 4.2                       | 15.7                      | 100             |
| 2009 | Nov   | 21  | 8:36:00  | 49.209   | -4.161 | 9                | 1.205          | 7.5                       | 2.5                       | 2.5                       | 12.5                      | 78              |
| 2009 | Nov   | 21  | 9:38:00  | 49.425   | -3.756 | 8                | 1.205          | 6.6                       | 2.3                       | 1.9                       | 11.3                      | 75              |
| 2009 | Nov   | 21  | 10:30:00 | 49.628   | -3.437 | 18               | 1.205          | 14.9                      | 3.5                       | 7.9                       | 22.0                      | 78              |
| 2009 | Nov   | 21  | 11:30:00 | 49.814   | -3.011 | 24               | 1.205          | 19.9                      | 4.1                       | 11.8                      | 28.1                      | 83              |
| 2009 | Nov   | 21  | 12:33:00 | 49.915   | -2.501 | 19               | 1.205          | 15.8                      | 3.6                       | 8.5                       | 23.0                      | 95              |
| 2009 | Nov   | 21  | 13:29:00 | 50.077   | -2.096 | 8                | 1.205          | 6.6                       | 2.3                       | 1.9                       | 11.3                      | 100             |
| 2009 | Nov   | 21  | 14:31:00 | 50.270   | -1.701 | 13               | 1.205          | 10.8                      | 3.0                       | 4.8                       | 16.8                      | 100             |
| 2009 | Nov   | 21  | 15:30:00 | 50.436   | -1.324 | 8                | 1.205          | 6.6                       | 2.3                       | 1.9                       | 11.3                      | 75              |



Table S15 – December 2009

| DATE |       |     |          | LOCATION |        | COCCOLITHOPHORES |                |                           |                           |                           |                           |                 |
|------|-------|-----|----------|----------|--------|------------------|----------------|---------------------------|---------------------------|---------------------------|---------------------------|-----------------|
| year | month | day | time     | lat      | lon    | number counted   | volume counted | concentration mean        | standard error            | 95% confidence interval   |                           | % overcalcified |
|      |       |     | (UTC)    | (°N)     | (°E)   | (cells)          | (mLitres)      | (cells mL <sup>-1</sup> ) | (%)             |
| 2009 | Dec   | 10  | 9:04:19  | 49.240   | -4.090 | 0                | 0.540          | 0.0                       | 0.0                       | 0.0                       | 0.0                       |                 |
| 2009 | Dec   | 10  | 10:22:13 | 49.027   | -4.509 | 2                | 0.515          | 3.9                       | 2.7                       | 0.0                       | 9.4                       |                 |
| 2009 | Dec   | 10  | 11:32:56 | 48.815   | -4.907 | 3                | 0.540          | 5.6                       | 3.2                       | 0.0                       | 12.0                      |                 |
| 2009 | Dec   | 10  | 13:57:04 | 48.211   | -5.414 | 3                | 0.765          | 3.9                       | 2.3                       | 0.0                       | 8.5                       |                 |
| 2009 | Dec   | 10  | 15:11:31 | 47.826   | -5.253 | 2                | 0.622          | 3.2                       | 2.3                       | 0.0                       | 7.8                       |                 |
| 2009 | Dec   | 10  | 16:17:02 | 47.502   | -5.088 | 2                | 0.765          | 2.6                       | 1.8                       | 0.0                       | 6.3                       |                 |
| 2009 | Dec   | 10  | 17:15:39 | 47.216   | -4.946 | 4                | 0.816          | 4.9                       | 2.5                       | 0.0                       | 9.8                       | 100             |
| 2009 | Dec   | 10  | 18:14:50 | 46.932   | -4.791 | 7                | 0.913          | 7.7                       | 2.9                       | 1.9                       | 13.5                      | 71              |
| 2009 | Dec   | 10  | 19:34:54 | 46.545   | -4.590 | 5                | 1.055          | 4.7                       | 2.1                       | 0.5                       | 9.0                       | 100             |
| 2009 | Dec   | 11  | 12:05:54 | 43.423   | -3.103 | 2                | 1.147          | 1.7                       | 1.2                       | 0.0                       | 4.2                       |                 |
| 2009 | Dec   | 11  | 13:07:58 | 43.744   | -3.249 | 3                | 0.928          | 3.2                       | 1.9                       | 0.0                       | 7.0                       |                 |
| 2009 | Dec   | 11  | 14:10:28 | 44.068   | -3.396 | 8                | 0.668          | 12.0                      | 4.2                       | 3.5                       | 20.4                      | 100             |
| 2009 | Dec   | 11  | 15:04:28 | 44.347   | -3.526 | 5                | 0.500          | 10.0                      | 4.5                       | 1.1                       | 19.0                      | 100             |
| 2009 | Dec   | 11  | 16:06:14 | 44.656   | -3.709 | 8                | 0.510          | 15.7                      | 5.5                       | 4.6                       | 26.8                      | 100             |
| 2009 | Dec   | 11  | 17:10:45 | 44.977   | -3.908 | 20               | 1.147          | 17.4                      | 3.9                       | 9.6                       | 25.2                      | 95              |
| 2009 | Dec   | 11  | 18:16:42 | 45.294   | -4.131 | 11               | 0.663          | 16.6                      | 5.0                       | 6.6                       | 26.6                      | 100             |
| 2009 | Dec   | 11  | 19:17:46 | 45.568   | -4.387 | 5                | 0.673          | 7.4                       | 3.3                       | 0.8                       | 14.1                      | 100             |
| 2009 | Dec   | 11  | 20:11:54 | 45.812   | -4.616 | 5                | 0.948          | 5.3                       | 2.4                       | 0.6                       | 10.0                      | 100             |
| 2009 | Dec   | 12  | 8:40:25  | 49.201   | -4.231 | 1                | 0.372          | 2.7                       | 2.7                       | 0.0                       | 8.1                       |                 |
| 2009 | Dec   | 12  | 9:44:47  | 49.414   | -3.856 | 1                | 0.270          | 3.7                       | 3.7                       | 0.0                       | 11.1                      |                 |
| 2009 | Dec   | 12  | 10:44:15 | 49.613   | -3.554 | 1                | 0.291          | 3.4                       | 3.4                       | 0.0                       | 10.3                      |                 |
| 2009 | Dec   | 12  | 11:44:53 | 49.756   | -3.146 | 2                | 0.250          | 8.0                       | 5.7                       | 0.0                       | 19.3                      |                 |
| 2009 | Dec   | 12  | 12:47:23 | 49.875   | -2.700 | 0                | 0.204          | 0.0                       | 0.0                       | 0.0                       | 0.0                       |                 |
| 2009 | Dec   | 12  | 13:47:08 | 50.005   | -2.275 | 1                | 0.219          | 4.6                       | 4.6                       | 0.0                       | 13.7                      |                 |
| 2009 | Dec   | 12  | 14:44:27 | 50.204   | -1.918 | 2                | 0.291          | 6.9                       | 4.9                       | 0.0                       | 16.6                      |                 |
| 2009 | Dec   | 12  | 15:41:11 | 50.368   | -1.496 | 0                | 0.520          | 0.0                       | 0.0                       | 0.0                       | 0.0                       |                 |

Table S16 – February 2010

| DATE |       |     |          | LOCATION |        | COCCOLITHOPHORES  |                   |                           |                           |                           |                           |                 |
|------|-------|-----|----------|----------|--------|-------------------|-------------------|---------------------------|---------------------------|---------------------------|---------------------------|-----------------|
| year | month | day | time     | lat      | lon    | number<br>counted | volume<br>counted | concentration<br>mean     | standard<br>error         | 95% confidence interval   |                           | % overcalcified |
|      |       |     | (UTC)    | (°N)     | (°E)   | (cells)           | (mLitres)         | (cells mL <sup>-1</sup> ) | (%)             |
| 2010 | Feb   | 16  | 9:33:33  | 48.622   | -5.263 | 2                 | 0.296             | 6.8                       | 4.8                       | 0.0                       | 16.3                      |                 |
| 2010 | Feb   | 16  | 11:56:59 | 48.035   | -5.346 | 0                 | 0.260             | 0.0                       | 0.0                       | 0.0                       | 0.0                       |                 |
| 2010 | Feb   | 16  | 16:04:13 | 47.100   | -4.852 | 7                 | 0.464             | 15.1                      | 5.7                       | 3.7                       | 26.5                      | 100             |
| 2010 | Feb   | 17  | 12:50:15 | 43.577   | -3.177 | 5                 | 1.147             | 4.4                       | 1.9                       | 0.5                       | 8.3                       | 40              |
| 2010 | Feb   | 17  | 13:50:27 | 43.900   | -3.298 | 8                 | 0.851             | 9.4                       | 3.3                       | 2.8                       | 16.0                      | 75              |
| 2010 | Feb   | 17  | 14:47:20 | 44.196   | -3.419 | 4                 | 0.785             | 5.1                       | 2.5                       | 0.0                       | 10.2                      | 100             |
| 2010 | Feb   | 17  | 15:58:19 | 44.559   | -3.597 | 10                | 0.755             | 13.3                      | 4.2                       | 4.9                       | 21.6                      | 90              |
| 2010 | Feb   | 17  | 16:55:55 | 44.851   | -3.743 | 8                 | 0.591             | 13.5                      | 4.8                       | 4.0                       | 23.1                      | 88              |
| 2010 | Feb   | 17  | 17:59:25 | 45.173   | -3.910 | 2                 | 0.474             | 4.2                       | 3.0                       | 0.0                       | 10.2                      |                 |
| 2010 | Feb   | 17  | 20:00:06 | 45.797   | -4.222 | 1                 | 0.280             | 3.6                       | 3.6                       | 0.0                       | 10.7                      |                 |
| 2010 | Feb   | 17  | 21:01:35 | 46.114   | -4.380 | 1                 | 0.286             | 3.5                       | 3.5                       | 0.0                       | 10.5                      |                 |
| 2010 | Feb   | 17  | 22:00:03 | 46.397   | -4.562 | 2                 | 0.286             | 7.0                       | 5.0                       | 0.0                       | 16.9                      |                 |
| 2010 | Feb   | 17  | 22:59:31 | 46.711   | -4.700 | 2                 | 0.240             | 8.3                       | 5.9                       | 0.0                       | 20.2                      |                 |
| 2010 | Feb   | 18  | 0:07:12  | 47.071   | -4.859 | 0                 | 0.235             | 0.0                       | 0.0                       | 0.0                       | 0.0                       |                 |
| 2010 | Feb   | 18  | 1:05:40  | 47.381   | -4.995 | 4                 | 0.561             | 7.1                       | 3.6                       | 0.0                       | 14.3                      | 100             |
| 2010 | Feb   | 18  | 3:04:19  | 48.007   | -5.328 | 12                | 0.663             | 18.1                      | 5.2                       | 7.7                       | 28.6                      | 92              |
| 2010 | Feb   | 18  | 4:09:16  | 48.375   | -5.420 | 7                 | 0.775             | 9.0                       | 3.4                       | 2.2                       | 15.9                      | 100             |
| 2010 | Feb   | 18  | 5:04:08  | 48.653   | -5.188 | 4                 | 0.678             | 5.9                       | 2.9                       | 0.0                       | 11.8                      | 100             |
| 2010 | Feb   | 18  | 6:01:09  | 48.871   | -4.763 | 9                 | 0.530             | 17.0                      | 5.7                       | 5.7                       | 28.3                      | 100             |
| 2010 | Feb   | 18  | 7:00:20  | 49.096   | -4.324 | 9                 | 0.454             | 19.8                      | 6.6                       | 6.6                       | 33.1                      | 100             |
| 2010 | Feb   | 18  | 8:02:07  | 49.332   | -3.876 | 0                 | 0.229             | 0.0                       | 0.0                       | 0.0                       | 0.0                       |                 |
| 2010 | Feb   | 18  | 9:00:09  | 49.549   | -3.456 | 2                 | 0.255             | 7.8                       | 5.5                       | 0.0                       | 18.9                      |                 |
| 2010 | Feb   | 18  | 10:03:22 | 49.803   | -3.024 | 1                 | 0.291             | 3.4                       | 3.4                       | 0.0                       | 10.3                      |                 |
| 2010 | Feb   | 18  | 11:00:23 | 49.924   | -2.521 | 2                 | 0.194             | 10.3                      | 7.3                       | 0.0                       | 24.9                      |                 |
| 2010 | Feb   | 18  | 12:03:53 | 50.097   | -1.987 | 0                 | 0.291             | 0.0                       | 0.0                       | 0.0                       | 0.0                       |                 |
| 2010 | Feb   | 18  | 13:02:30 | 50.323   | -1.583 | 1                 | 0.296             | 3.4                       | 3.4                       | 0.0                       | 10.1                      |                 |

Table S17 – March 2010

| DATE |       |     |          | LOCATION |        | COCCOLITHOPHORES |                |                           |                           |                           |                           |                 |
|------|-------|-----|----------|----------|--------|------------------|----------------|---------------------------|---------------------------|---------------------------|---------------------------|-----------------|
| year | month | day | time     | lat      | lon    | number counted   | volume counted | concentration mean        | standard error            | 95% confidence interval   |                           | % overcalcified |
|      |       |     | (UTC)    | (°N)     | (°E)   | (cells)          | (mLitres)      | (cells mL <sup>-1</sup> ) | (cells mL <sup>-1</sup> ) | lower                     | upper                     | (%)             |
|      |       |     |          |          |        |                  |                |                           |                           | (cells mL <sup>-1</sup> ) | (cells mL <sup>-1</sup> ) |                 |
| 2010 | Mar   | 16  | 12:43:47 | 47.711   | -5.163 | 6                | 0.535          | 11.2                      | 4.6                       | 2.1                       | 20.4                      | 100             |
| 2010 | Mar   | 16  | 15:00:09 | 47.209   | -4.912 | 4                | 0.635          | 6.3                       | 3.2                       | 0.0                       | 12.6                      | 38              |
| 2010 | Mar   | 17  | 13:06:14 | 43.739   | -3.228 | 8                | 0.989          | 8.1                       | 2.9                       | 2.4                       | 13.8                      | 100             |
| 2010 | Mar   | 17  | 15:07:03 | 44.399   | -3.530 | 8                | 1.331          | 6.0                       | 2.1                       | 1.8                       | 10.3                      | 100             |
| 2010 | Mar   | 17  | 16:00:46 | 44.685   | -3.670 | 13               | 0.887          | 14.7                      | 4.1                       | 6.5                       | 22.8                      | 50              |
| 2010 | Mar   | 17  | 17:16:31 | 45.094   | -3.867 | 4                | 0.994          | 4.0                       | 2.0                       | 0.0                       | 8.0                       | 80              |
| 2010 | Mar   | 17  | 18:03:01 | 45.349   | -3.989 | 5                | 0.887          | 5.6                       | 2.5                       | 0.6                       | 10.7                      | 80              |
| 2010 | Mar   | 17  | 19:00:29 | 45.661   | -4.138 | 5                | 0.834          | 6.0                       | 2.7                       | 0.6                       | 11.4                      | 0               |
| 2010 | Mar   | 17  | 20:04:08 | 46.003   | -4.302 | 13               | 0.956          | 13.6                      | 3.8                       | 6.1                       | 21.1                      | 93              |
| 2010 | Mar   | 17  | 21:02:27 | 46.315   | -4.451 | 14               | 1.017          | 13.8                      | 3.7                       | 6.4                       | 21.1                      | 100             |
| 2010 | Mar   | 17  | 22:02:12 | 46.638   | -4.619 | 5                | 1.346          | 3.7                       | 1.7                       | 0.4                       | 7.0                       | 100             |
| 2010 | Mar   | 18  | 0:04:19  | 47.296   | -4.985 | 7                | 1.032          | 6.8                       | 2.6                       | 1.7                       | 11.9                      | 100             |
| 2010 | Mar   | 18  | 1:03:48  | 47.625   | -5.148 | 9                | 0.512          | 17.6                      | 5.9                       | 5.9                       | 29.3                      | 50              |
| 2010 | Mar   | 18  | 1:58:13  | 47.939   | -5.270 | 5                | 0.528          | 9.5                       | 4.2                       | 1.0                       | 18.0                      |                 |
| 2010 | Mar   | 18  | 3:04:36  | 48.331   | -5.418 | 2                | 1.721          | 1.2                       | 0.8                       | 0.0                       | 2.8                       | 100             |
| 2010 | Mar   | 18  | 4:02:21  | 48.646   | -5.226 | 0                | 0.398          | 0.0                       | 0.0                       | 0.0                       | 0.0                       |                 |
| 2010 | Mar   | 18  | 5:03:16  | 48.891   | -4.781 | 1                | 0.421          | 2.4                       | 2.4                       | 0.0                       | 7.1                       |                 |
| 2010 | Mar   | 18  | 6:04:11  | 49.119   | -4.323 | 0                | 0.344          | 0.0                       | 0.0                       | 0.0                       | 0.0                       |                 |
| 2010 | Mar   | 18  | 7:03:56  | 49.335   | -3.871 | 2                | 0.558          | 3.6                       | 2.5                       | 0.0                       | 8.6                       |                 |
| 2010 | Mar   | 18  | 8:02:59  | 49.544   | -3.455 | 0                | 0.658          | 0.0                       | 0.0                       | 0.0                       | 0.0                       |                 |
| 2010 | Mar   | 18  | 10:01:21 | 49.868   | -2.681 | 10               | 0.398          | 25.1                      | 8.0                       | 9.2                       | 41.1                      | 100             |
| 2010 | Mar   | 18  | 11:01:41 | 49.990   | -2.255 | 0                | 0.543          | 0.0                       | 0.0                       | 0.0                       | 0.0                       |                 |
| 2010 | Mar   | 18  | 12:09:39 | 50.179   | -1.851 | 1                | 0.433          | 2.3                       | 2.3                       | 0.0                       | 6.9                       |                 |
| 2010 | Mar   | 18  | 13:06:40 | 50.319   | -1.559 | 3                | 0.561          | 5.3                       | 3.1                       | 0.0                       | 11.5                      |                 |
| 2010 | Mar   | 18  | 14:04:08 | 50.440   | -1.320 | 1                | 0.887          | 1.1                       | 1.1                       | 0.0                       | 3.4                       |                 |

Table S18 – April 2010

| DATE |       |     |          | LOCATION |        | COCCOLITHOPHORES  |                   |                           |                              |                              |                              |                    |
|------|-------|-----|----------|----------|--------|-------------------|-------------------|---------------------------|------------------------------|------------------------------|------------------------------|--------------------|
| year | month | day | time     | lat      | lon    | number<br>counted | volume<br>counted | concentration<br>mean     | standard<br>error            | 95% confidence<br>interval   |                              | %<br>overcalcified |
|      |       |     | (UTC)    | (°N)     | (°E)   | (cells)           | (mLitres)         | (cells mL <sup>-1</sup> ) | (cells<br>mL <sup>-1</sup> ) | (cells<br>mL <sup>-1</sup> ) | (cells<br>mL <sup>-1</sup> ) | (%)                |
| 2010 | Apr   | 13  | 8:04:08  | 48.699   | -5.148 | 5                 | 0.454             | 11.0                      | 4.9                          | 1.2                          | 20.9                         | 100                |
| 2010 | Apr   | 13  | 12:28:39 | 47.651   | -4.600 | 14                | 0.571             | 24.5                      | 6.6                          | 11.4                         | 37.6                         | 43                 |
| 2010 | Apr   | 13  | 13:50:10 | 47.395   | -4.154 | 10                | 0.449             | 22.3                      | 7.0                          | 8.2                          | 36.4                         | 60                 |
| 2010 | Apr   | 14  | 11:02:41 | 43.379   | -3.078 | 3                 | 1.147             | 2.6                       | 1.5                          | 0.0                          | 5.6                          |                    |
| 2010 | Apr   | 14  | 12:05:20 | 43.710   | -3.219 | 9                 | 0.464             | 19.4                      | 6.5                          | 6.5                          | 32.3                         | 11                 |
| 2010 | Apr   | 14  | 13:03:56 | 44.032   | -3.368 | 22                | 1.147             | 19.2                      | 4.1                          | 11.0                         | 27.4                         | 45                 |
| 2010 | Apr   | 14  | 14:03:07 | 44.352   | -3.512 | 21                | 1.147             | 18.3                      | 4.0                          | 10.3                         | 26.3                         | 52                 |
| 2010 | Apr   | 14  | 14:58:51 | 44.648   | -3.653 | 13                | 1.147             | 11.3                      | 3.1                          | 5.0                          | 17.6                         | 77                 |
| 2010 | Apr   | 14  | 15:56:01 | 44.949   | -3.802 | 14                | 0.918             | 15.3                      | 4.1                          | 7.1                          | 23.4                         | 64                 |
| 2010 | Apr   | 14  | 16:57:39 | 45.276   | -3.966 | 18                | 0.433             | 41.5                      | 9.8                          | 22.0                         | 61.1                         | 0                  |
| 2010 | Apr   | 14  | 17:58:08 | 45.590   | -4.128 | 23                | 0.551             | 41.8                      | 8.7                          | 24.4                         | 59.2                         | 91                 |
| 2010 | Apr   | 14  | 19:07:06 | 45.948   | -4.310 | 28                | 0.245             | 114.4                     | 21.6                         | 71.2                         | 157.7                        | 75                 |
| 2010 | Apr   | 14  | 20:04:25 | 46.241   | -4.460 | 13                | 0.362             | 35.9                      | 10.0                         | 16.0                         | 55.8                         | 100                |
| 2010 | Apr   | 14  | 21:05:11 | 46.563   | -4.605 | 10                | 1.147             | 8.7                       | 2.8                          | 3.2                          | 14.2                         | 0                  |
| 2010 | Apr   | 14  | 22:06:58 | 46.893   | -4.765 | 4                 | 1.147             | 3.5                       | 1.7                          | 0.0                          | 7.0                          | 75                 |
| 2010 | Apr   | 14  | 23:02:50 | 47.194   | -4.917 | 10                | 1.147             | 8.7                       | 2.8                          | 3.2                          | 14.2                         | 70                 |
| 2010 | Apr   | 15  | 0:03:10  | 47.521   | -5.081 | 12                | 0.749             | 16.0                      | 4.6                          | 6.8                          | 25.3                         | 50                 |
| 2010 | Apr   | 15  | 1:03:39  | 47.853   | -5.253 | 5                 | 0.255             | 19.6                      | 8.8                          | 2.1                          | 37.2                         | 60                 |
| 2010 | Apr   | 15  | 2:02:07  | 48.173   | -5.424 | 9                 | 0.393             | 22.9                      | 7.6                          | 7.6                          | 38.2                         | 67                 |
| 2010 | Apr   | 15  | 2:58:51  | 48.502   | -5.408 | 19                | 0.729             | 26.1                      | 6.0                          | 14.1                         | 38.0                         | 74                 |
| 2010 | Apr   | 15  | 3:55:35  | 48.739   | -5.042 | 7                 | 0.382             | 18.3                      | 6.9                          | 4.5                          | 32.1                         | 86                 |
| 2010 | Apr   | 15  | 4:56:56  | 48.966   | -4.614 | 1                 | 0.474             | 2.1                       | 2.1                          | 0.0                          | 6.3                          |                    |
| 2010 | Apr   | 15  | 6:01:44  | 49.199   | -4.156 | 0                 | 1.147             | 0.0                       | 0.0                          | 0.0                          | 0.0                          |                    |
| 2010 | Apr   | 15  | 7:05:14  | 49.427   | -3.717 | 1                 | 0.744             | 1.3                       | 1.3                          | 0.0                          | 4.0                          |                    |
| 2010 | Apr   | 15  | 8:03:33  | 49.637   | -3.320 | 0                 | 1.147             | 0.0                       | 0.0                          | 0.0                          | 0.0                          |                    |
| 2010 | Apr   | 15  | 9:05:28  | 49.843   | -2.883 | 14                | 0.556             | 25.2                      | 6.7                          | 11.7                         | 38.7                         | 86                 |
| 2010 | Apr   | 15  | 10:03:39 | 49.934   | -2.384 | 13                | 0.270             | 48.1                      | 13.3                         | 21.4                         | 74.8                         | 92                 |
| 2010 | Apr   | 15  | 11:06:17 | 50.146   | -1.945 | 4                 | 0.637             | 6.3                       | 3.1                          | 0.0                          | 12.6                         | 75                 |
| 2010 | Apr   | 15  | 12:02:53 | 50.341   | -1.577 | 1                 | 0.928             | 1.1                       | 1.1                          | 0.0                          | 3.2                          |                    |
| 2010 | Apr   | 15  | 13:00:12 | 50.495   | -1.197 | 0                 | 1.147             | 0.0                       | 0.0                          | 0.0                          | 0.0                          |                    |

Table S19 – May 2010

| DATE |       |     |          | LOCATION |        | COCCOLITHOPHORES  |                   |                           |                              |                            |                              |                    |
|------|-------|-----|----------|----------|--------|-------------------|-------------------|---------------------------|------------------------------|----------------------------|------------------------------|--------------------|
| year | month | day | time     | lat      | lon    | number<br>counted | volume<br>counted | concentration<br>mean     | standard<br>error            | 95% confidence<br>interval |                              | %<br>overcalcified |
|      |       |     | (UTC)    | (°N)     | (°E)   | (cells)           | (mLitres)         | (cells mL <sup>-1</sup> ) | (cells<br>mL <sup>-1</sup> ) | (cells mL <sup>-1</sup> )  | (cells<br>mL <sup>-1</sup> ) | (%)                |
| 2010 | May   | 12  | 11:15:48 | 43.457   | -3.116 | 12                | 0.994             | 12.1                      | 3.5                          | 5.1                        | 19.0                         | 25                 |
| 2010 | May   | 12  | 12:23:02 | 43.809   | -3.286 | 78                | 0.076             | 1024.3                    | 115.7                        | 792.8                      | 1255.8                       |                    |
| 2010 | May   | 12  | 14:28:11 | 44.467   | -3.566 | 10                | 1.300             | 7.7                       | 2.4                          | 2.8                        | 12.6                         | 10                 |
| 2010 | May   | 13  | 13:27:07 | 50.469   | -1.324 | 5                 | 0.918             | 5.4                       | 2.4                          | 0.6                        | 10.3                         | 40                 |

Table S20 – June 2010

| DATE |       |     |          | LOCATION |        | COCCOLITHOPHORES |           |                           |                           |                           |                           |               |
|------|-------|-----|----------|----------|--------|------------------|-----------|---------------------------|---------------------------|---------------------------|---------------------------|---------------|
| year | month | day | time     | lat      | lon    | number           | volume    | concentration             | standard                  | 95% confidence interval   |                           | %             |
|      |       |     | (UTC)    | (°N)     | (°E)   | counted          | counted   | mean                      | error                     | lower                     | upper                     | overcalcified |
|      |       |     |          |          |        | (cells)          | (mLitres) | (cells mL <sup>-1</sup> ) | (%)           |
| 2010 | Jun   | 16  | 8:09:45  | 48.935   | -4.694 | 10               | 0.817     | 12.2                      | 3.9                       | 4.5                       | 20.0                      | 50            |
| 2010 | Jun   | 17  | 12:23:46 | 43.614   | -3.162 | 7                | 1.331     | 5.3                       | 2.0                       | 1.3                       | 9.2                       | 0             |
| 2010 | Jun   | 17  | 13:22:48 | 43.879   | -3.326 | 7                | 1.147     | 6.1                       | 2.3                       | 1.5                       | 10.7                      | 14            |
| 2010 | Jun   | 17  | 14:22:08 | 44.189   | -3.451 | 4                | 1.147     | 3.5                       | 1.7                       | 0.0                       | 7.0                       | 0             |
| 2010 | Jun   | 17  | 15:31:32 | 44.548   | -3.620 | 2                | 1.985     | 1.0                       | 0.7                       | 0.0                       | 2.4                       |               |
| 2010 | Jun   | 17  | 17:15:39 | 45.088   | -3.895 | 0                | 1.721     | 0.0                       | 0.0                       | 0.0                       | 0.0                       |               |
| 2010 | Jun   | 17  | 18:19:09 | 45.419   | -4.067 | 4                | 1.147     | 3.5                       | 1.7                       | 0.0                       | 7.0                       | 0             |
| 2010 | Jun   | 17  | 19:32:53 | 45.790   | -4.249 | 6                | 0.714     | 8.4                       | 3.4                       | 1.5                       | 15.3                      | 0             |
| 2010 | Jun   | 17  | 20:31:03 | 46.102   | -4.387 | 7                | 0.841     | 8.3                       | 3.1                       | 2.0                       | 14.6                      | 0             |
| 2010 | Jun   | 17  | 21:31:41 | 46.419   | -4.536 | 6                | 0.775     | 7.7                       | 3.2                       | 1.4                       | 14.1                      | 17            |
| 2010 | Jun   | 17  | 22:25:41 | 46.687   | -4.678 | 7                | 0.704     | 9.9                       | 3.8                       | 2.4                       | 17.5                      | 0             |
| 2010 | Jun   | 17  | 23:35:23 | 47.028   | -4.850 | 2                | 0.608     | 3.3                       | 2.3                       | 0.0                       | 7.9                       |               |
| 2010 | Jun   | 18  | 1:39:13  | 47.652   | -5.165 | 4                | 0.228     | 17.6                      | 8.8                       | 0.0                       | 35.2                      | 0             |
| 2010 | Jun   | 18  | 2:43:52  | 47.979   | -5.315 | 6                | 0.428     | 14.0                      | 5.7                       | 2.6                       | 25.4                      | 17            |
| 2010 | Jun   | 18  | 4:05:40  | 48.435   | -5.406 | 7                | 0.232     | 30.2                      | 11.4                      | 7.4                       | 53.1                      | 0             |
| 2010 | Jun   | 18  | 5:10:11  | 48.703   | -5.126 | 3                | 0.653     | 4.6                       | 2.7                       | 0.0                       | 9.9                       |               |
| 2010 | Jun   | 18  | 6:10:39  | 48.911   | -4.712 | 3                | 0.505     | 5.9                       | 3.4                       | 0.0                       | 12.8                      |               |
| 2010 | Jun   | 18  | 7:00:20  | 49.095   | -4.374 | 15               | 0.602     | 24.9                      | 6.4                       | 12.1                      | 37.8                      | 60            |
| 2010 | Jun   | 18  | 7:59:48  | 49.306   | -3.959 | 4                | 1.147     | 3.5                       | 1.7                       | 0.0                       | 7.0                       | 50            |
| 2010 | Jun   | 18  | 9:00:35  | 49.526   | -3.534 | 1                | 1.147     | 0.9                       | 0.9                       | 0.0                       | 2.6                       |               |
| 2010 | Jun   | 18  | 10:00:37 | 49.729   | -3.106 | 0                | 1.147     | 0.0                       | 0.0                       | 0.0                       | 0.0                       |               |
| 2010 | Jun   | 18  | 11:08:10 | 49.908   | -2.573 | 28               | 0.770     | 36.4                      | 6.9                       | 22.6                      | 50.1                      | 46            |
| 2010 | Jun   | 18  | 12:40:02 | 50.230   | -1.907 | 21               | 0.331     | 63.4                      | 13.8                      | 35.7                      | 91.0                      | 43            |
| 2010 | Jun   | 16  | 11:02:33 | 48.234   | -5.422 | 1                | 0.433     | 2.3                       | 2.3                       | 0.0                       | 6.9                       |               |
| 2010 | Jun   | 16  | 11:02:33 | 48.234   | -5.422 | 5                | 0.495     | 10.1                      | 4.5                       | 1.1                       | 19.2                      | 40            |
| 2010 | Jun   | 16  | 13:59:31 | 47.343   | -5.228 | 0                | 0.350     | 0.0                       | 0.0                       | 0.0                       | 0.0                       |               |
| 2010 | Jun   | 16  | 13:59:31 | 47.343   | -5.228 | 1                | 0.475     | 2.1                       | 2.1                       | 0.0                       | 6.3                       |               |
| 2010 | Jun   | 16  | 13:59:31 | 47.343   | -5.228 | 2                | 0.356     | 5.6                       | 4.0                       | 0.0                       | 13.6                      |               |
| 2010 | Jun   | 16  | 13:59:31 | 47.343   | -5.228 | 0                | 0.338     | 0.0                       | 0.0                       | 0.0                       | 0.0                       |               |
| 2010 | Jun   | 16  | 23:24:00 | 44.988   | -3.894 | 1                | 2.294     | 0.4                       | 0.4                       | 0.0                       | 1.3                       |               |
| 2010 | Jun   | 16  | 23:24:00 | 44.988   | -3.894 | 1                | 2.294     | 0.4                       | 0.4                       | 0.0                       | 1.3                       |               |
| 2010 | Jun   | 16  | 23:24:00 | 44.988   | -3.894 | 1                | 2.294     | 0.4                       | 0.4                       | 0.0                       | 1.3                       |               |
| 2010 | Jun   | 16  | 23:24:00 | 44.988   | -3.894 | 1                | 1.147     | 0.9                       | 0.9                       | 0.0                       | 2.6                       |               |
| 2010 | Jun   | 16  | 23:24:00 | 44.988   | -3.894 | 0                | 1.147     | 0.0                       | 0.0                       | 0.0                       | 0.0                       |               |

Table S21 – July 2010

| DATE |       |     |          | LOCATION |        | COCCOLITHOPHORES |                |                           |                           |                           |                           | % overcalcified |
|------|-------|-----|----------|----------|--------|------------------|----------------|---------------------------|---------------------------|---------------------------|---------------------------|-----------------|
| year | month | day | time     | lat      | lon    | number counted   | volume counted | concentration mean        | standard error            | 95% confidence interval   |                           |                 |
|      |       |     | (UTC)    | (°N)     | (°E)   |                  |                |                           |                           | lower                     | upper                     |                 |
|      |       |     |          |          |        | (cells)          | (mLitres)      | (cells mL <sup>-1</sup> ) | (%)             |
| 2010 | Jul   | 13  | 9:25:47  | 48.660   | -5.190 | 9                | 0.184          | 49.0                      | 16.3                      | 16.3                      | 81.7                      | 0               |
| 2010 | Jul   | 13  | 14:56:24 | 47.270   | -5.420 | 4                | 0.510          | 7.8                       | 3.9                       | 0.0                       | 15.7                      | 0               |
| 2010 | Jul   | 13  | 15:58:36 | 46.988   | -5.377 | 4                | 0.790          | 5.1                       | 2.5                       | 0.0                       | 10.1                      | 0               |
| 2010 | Jul   | 13  | 19:03:13 | 46.180   | -5.003 | 1                | 1.147          | 0.9                       | 0.9                       | 0.0                       | 2.6                       |                 |
| 2010 | Jul   | 14  | 12:29:48 | 43.531   | -3.154 | 4                | 1.147          | 3.5                       | 1.7                       | 0.0                       | 7.0                       | 0               |
| 2010 | Jul   | 14  | 17:37:49 | 45.005   | -3.547 | 4                | 1.050          | 3.8                       | 1.9                       | 0.0                       | 7.6                       | 0               |
| 2010 | Jul   | 14  | 18:30:23 | 45.262   | -3.601 | 4                | 1.147          | 3.5                       | 1.7                       | 0.0                       | 7.0                       | 0               |
| 2010 | Jul   | 15  | 9:53:00  | 49.026   | -4.521 | 12               | 0.270          | 44.4                      | 12.8                      | 18.8                      | 70.1                      | 0               |
| 2010 | Jul   | 15  | 10:56:47 | 49.228   | -4.146 | 9                | 0.841          | 10.7                      | 3.6                       | 3.6                       | 17.8                      | 11              |
| 2010 | Jul   | 15  | 12:00:52 | 49.445   | -3.750 | 4                | 1.147          | 3.5                       | 1.7                       | 0.0                       | 7.0                       | 0               |
| 2010 | Jul   | 15  | 12:39:10 | 49.579   | -3.513 | 1                | 0.459          | 2.2                       | 2.2                       | 0.0                       | 6.5                       |                 |
| 2010 | Jul   | 15  | 13:15:45 | 49.687   | -3.289 | 1                | 0.459          | 2.2                       | 2.2                       | 0.0                       | 6.5                       |                 |
| 2010 | Jul   | 15  | 14:05:43 | 49.828   | -2.953 | 0                | 0.918          | 0.0                       | 0.0                       | 0.0                       | 0.0                       |                 |
| 2010 | Jul   | 15  | 14:58:34 | 49.911   | -2.569 | 2                | 1.147          | 1.7                       | 1.2                       | 0.0                       | 4.2                       |                 |
| 2010 | Jul   | 15  | 15:57:36 | 50.034   | -2.219 | 12               | 0.336          | 35.7                      | 10.3                      | 15.1                      | 56.3                      | 0               |
| 2010 | Jul   | 15  | 16:45:24 | 50.153   | -1.912 | 7                | 0.245          | 28.6                      | 10.8                      | 7.0                       | 50.2                      | 0               |
| 2010 | Jul   | 13  | 7:31:18  | 49.030   | -4.560 | 6                | 0.398          | 15.1                      | 6.2                       | 2.8                       | 27.4                      | 0               |
| 2010 | Jul   | 13  | 8:30:55  | 48.840   | -4.890 | 6                | 0.104          | 57.7                      | 23.6                      | 10.6                      | 104.8                     | 0               |
| 2010 | Jul   | 13  | 8:30:55  | 48.840   | -4.890 | 7                | 0.113          | 61.8                      | 23.4                      | 15.1                      | 108.6                     | 0               |
| 2010 | Jul   | 13  | 8:30:55  | 48.840   | -4.890 | 17               | 0.117          | 145.0                     | 35.2                      | 74.7                      | 215.3                     | 0               |
| 2010 | Jul   | 13  | 8:30:55  | 48.840   | -4.890 | 4                | 0.105          | 38.3                      | 19.1                      | 0.0                       | 76.5                      | 0               |
| 2010 | Jul   | 13  | 10:27:33 | 48.390   | -5.420 | 4                | 0.633          | 6.3                       | 3.2                       | 0.0                       | 12.6                      | 0               |
| 2010 | Jul   | 13  | 10:27:33 | 48.390   | -5.420 | 3                | 0.590          | 5.1                       | 2.9                       | 0.0                       | 10.9                      |                 |
| 2010 | Jul   | 13  | 11:54:58 | 48.100   | -5.520 | 3                | 1.045          | 2.9                       | 1.7                       | 0.0                       | 6.2                       |                 |
| 2010 | Jul   | 13  | 13:59:05 | 47.539   | -5.446 | 1                | 0.948          | 1.1                       | 1.1                       | 0.0                       | 3.2                       |                 |
| 2010 | Jul   | 13  | 17:00:58 | 46.715   | -5.347 | 0                | 1.147          | 0.0                       | 0.0                       | 0.0                       | 0.0                       |                 |
| 2010 | Jul   | 14  | 13:30:00 | 43.824   | -3.286 | 4                | 1.529          | 2.6                       | 1.3                       | 0.0                       | 5.2                       | 0               |
| 2010 | Jul   | 14  | 13:30:00 | 43.824   | -3.286 | 2                | 1.231          | 1.6                       | 1.1                       | 0.0                       | 3.9                       |                 |
| 2010 | Jul   | 14  | 14:34:31 | 44.138   | -3.390 | 8                | 1.147          | 7.0                       | 2.5                       | 2.0                       | 11.9                      | 0               |
| 2010 | Jul   | 14  | 14:34:31 | 44.138   | -3.390 | 1                | 0.574          | 1.7                       | 1.7                       | 0.0                       | 5.2                       |                 |
| 2010 | Jul   | 14  | 14:34:31 | 44.138   | -3.390 | 2                | 0.574          | 3.5                       | 2.5                       | 0.0                       | 8.4                       |                 |
| 2010 | Jul   | 14  | 15:31:06 | 44.489   | -3.434 | 3                | 1.137          | 2.6                       | 1.5                       | 0.0                       | 5.7                       |                 |
| 2010 | Jul   | 14  | 16:29:34 | 44.684   | -3.484 | 4                | 1.147          | 3.5                       | 1.7                       | 0.0                       | 7.0                       | 0               |

Table S22 – Summer 2006

| DATE |       |     |          | LOCATION |       | COCCOLITHOPHORES  |                   |                           |                           |                                    |                                    |                 |
|------|-------|-----|----------|----------|-------|-------------------|-------------------|---------------------------|---------------------------|------------------------------------|------------------------------------|-----------------|
| year | month | day | time     | lat      | lon   | number<br>counted | volume<br>counted | concentration<br>mean     | standard<br>error         | 95% confidence interval            |                                    | % overcalcified |
|      |       |     | (UTC)    | (°N)     | (°E)  | (cells)           | (mLitres)         | (cells mL <sup>-1</sup> ) | (cells mL <sup>-1</sup> ) | lower<br>(cells mL <sup>-1</sup> ) | upper<br>(cells mL <sup>-1</sup> ) | (%)             |
| 2006 | April | 12  | 03:03:00 | 43.94    | -3.38 | 50                | 0.219             | 228.0                     | 32.2                      | 163.5                              | 292.5                              | 48              |
| 2006 | April | 12  | 01:05:00 | 44.38    | -3.65 | 3                 | 0.219             | 13.7                      | 7.9                       | 0.0                                | 29.5                               |                 |
| 2006 | April | 11  | 23:07:00 | 44.68    | -4.14 | 2                 | 0.219             | 9.1                       | 6.4                       | 0.0                                | 22.0                               |                 |
| 2006 | April | 11  | 21:00:00 | 45.20    | -4.46 | 10                | 0.292             | 34.2                      | 10.8                      | 12.6                               | 55.8                               | 0               |
| 2006 | April | 11  | 19:03:00 | 45.68    | -4.79 | 3                 | 0.292             | 10.3                      | 5.9                       | 0.0                                | 22.1                               |                 |
| 2006 | April | 11  | 17:04:00 | 46.16    | -5.12 | 0                 | 0.292             | 0.0                       | 0.0                       | 0.0                                | 0.0                                |                 |
| 2006 | April | 11  | 15:07:00 | 46.66    | -5.31 | 3                 | 0.292             | 10.3                      | 5.9                       | 0.0                                | 22.1                               |                 |
| 2006 | April | 11  | 13:04:00 | 47.24    | -5.35 | 7                 | 0.292             | 23.9                      | 9.0                       | 5.8                                | 42.0                               | 0               |
| 2006 | April | 11  | 11:04:00 | 47.82    | -5.39 | 22                | 0.292             | 75.2                      | 16.0                      | 43.2                               | 107.3                              | 0               |
| 2006 | April | 11  | 08:58:00 | 48.43    | -5.45 | 3                 | 0.292             | 10.3                      | 5.9                       | 0.0                                | 22.1                               |                 |
| 2006 | April | 11  | 07:08:00 | 48.87    | -4.89 | 6                 | 0.731             | 8.2                       | 3.4                       | 1.5                                | 14.9                               | 0               |
| 2006 | April | 11  | 05:09:00 | 49.27    | -4.22 | 5                 | 0.731             | 6.8                       | 3.1                       | 0.7                                | 13.0                               | 0               |
| 2006 | April | 11  | 02:01:00 | 49.88    | -3.05 | 5                 | 0.731             | 6.8                       | 3.1                       | 0.7                                | 13.0                               | 0               |
| 2006 | April | 10  | 23:02:00 | 50.37    | -1.60 | 0                 | 0.731             | 0.0                       | 0.0                       | 0.0                                | 0.0                                |                 |
| 2006 | April | 10  | 21:05:00 | 50.76    | -1.09 | 0                 | 0.731             | 0.0                       | 0.0                       | 0.0                                | 0.0                                |                 |
| 2006 | May   | 12  | 03:05:00 | 43.97    | -3.46 | 950               | 1.097             | 866.4                     | 28.1                      | 810.1                              | 922.6                              | 0               |
| 2006 | May   | 12  | 01:02:00 | 44.60    | -3.87 | 630               | 1.462             | 430.9                     | 17.2                      | 396.6                              | 465.2                              | 0               |
| 2006 | May   | 11  | 23:08:00 | 45.06    | -4.17 | 450               | 1.462             | 307.8                     | 14.5                      | 278.8                              | 336.8                              | 6.2             |
| 2006 | May   | 11  | 21:04:00 | 45.52    | -4.54 | 884               | 1.316             | 671.8                     | 22.6                      | 626.6                              | 717.0                              | 0               |
| 2006 | May   | 11  | 19:04:00 | 45.98    | -4.89 | 397               | 1.462             | 271.5                     | 13.6                      | 244.3                              | 298.8                              | 0               |
| 2006 | May   | 11  | 17:01:00 | 46.49    | -5.23 | 542               | 1.462             | 370.7                     | 15.9                      | 338.9                              | 402.6                              | 0               |
| 2006 | May   | 11  | 15:07:00 | 46.95    | -5.43 | 574               | 1.608             | 356.9                     | 14.9                      | 327.1                              | 386.7                              | 0               |
| 2006 | May   | 11  | 13:02:00 | 47.46    | -5.45 | 93                | 1.462             | 63.6                      | 6.6                       | 50.4                               | 76.8                               | 0               |
| 2006 | May   | 11  | 11:03:00 | 47.93    | -5.47 | 206               | 1.170             | 176.1                     | 12.3                      | 151.6                              | 200.7                              | 0               |
| 2006 | May   | 11  | 09:01:00 | 48.49    | -5.46 | 115               | 2.003             | 57.4                      | 5.4                       | 46.7                               | 68.1                               | 0               |
| 2006 | May   | 11  | 07:01:00 | 48.95    | -4.71 | 17                | 1.023             | 16.6                      | 4.0                       | 8.6                                | 24.7                               | 0               |
| 2006 | May   | 11  | 05:02:00 | 49.31    | -3.97 | 19                | 2.719             | 7.0                       | 1.6                       | 3.8                                | 10.2                               | 0               |
| 2006 | May   | 11  | 03:06:00 | 49.73    | -3.44 | 94                | 2.559             | 36.7                      | 3.8                       | 29.2                               | 44.3                               | 0               |
| 2006 | May   | 11  | 01:08:00 | 50.05    | -2.66 | 5                 | 1.097             | 4.6                       | 2.0                       | 0.5                                | 8.6                                | 0               |
| 2006 | May   | 10  | 23:14:00 | 50.35    | -1.72 | 0                 | 1.316             | 0.0                       | 0.0                       | 0.0                                | 0.0                                |                 |
| 2006 | May   | 10  | 21:13:00 | 50.70    | -0.97 | 8                 | 1.023             | 7.8                       | 2.8                       | 2.3                                | 13.3                               | 0               |
| 2006 | June  | 14  | 13:01:00 | 43.79    | -3.32 | 32                | 1.462             | 21.9                      | 3.9                       | 14.1                               | 29.6                               | 0               |
| 2006 | June  | 14  | 15:01:00 | 44.39    | -3.67 | 33                | 1.462             | 22.6                      | 3.9                       | 14.7                               | 30.4                               | 0               |



|      |      |    |          |       |       |     |       |       |      |       |       |    |
|------|------|----|----------|-------|-------|-----|-------|-------|------|-------|-------|----|
| 2006 | June | 14 | 17:00:00 | 44.99 | -3.94 | 27  | 1.170 | 23.1  | 4.4  | 14.2  | 32.0  | 0  |
| 2006 | June | 14 | 19:00:00 | 45.60 | -4.22 | 17  | 1.170 | 14.5  | 3.5  | 7.5   | 21.6  | 0  |
| 2006 | June | 14 | 21:05:00 | 46.24 | -4.51 | 13  | 1.170 | 11.1  | 3.1  | 4.9   | 17.3  | 0  |
| 2006 | June | 14 | 23:04:00 | 46.84 | -4.80 | 12  | 1.272 | 9.4   | 2.7  | 4.0   | 14.9  | 0  |
| 2006 | June | 15 | 01:03:00 | 47.45 | -5.09 | 14  | 1.170 | 12.0  | 3.2  | 5.6   | 18.4  | 0  |
| 2006 | June | 15 | 03:03:00 | 48.09 | -5.37 | 93  | 1.462 | 63.6  | 6.6  | 50.4  | 76.8  | 0  |
| 2006 | June | 15 | 04:59:00 | 48.68 | -5.15 | 102 | 1.754 | 58.1  | 5.8  | 46.6  | 69.6  | 0  |
| 2006 | June | 15 | 07:00:59 | 49.12 | -4.27 | 62  | 1.462 | 42.4  | 5.4  | 31.6  | 53.2  | 0  |
| 2006 | June | 15 | 09:00:00 | 49.54 | -3.40 | 2   | 1.023 | 2.0   | 1.4  | 0.0   | 4.7   |    |
| 2006 | June | 15 | 11:28:00 | 50.00 | -2.24 | 1   | 1.170 | 0.9   | 0.9  | 0.0   | 2.6   |    |
| 2006 | June | 15 | 13:23:00 | 50.38 | -1.37 | 3   | 1.023 | 2.9   | 1.7  | 0.0   | 6.3   |    |
| 2006 | July | 11 | 03:59:00 | 43.69 | -3.31 | 5   | 1.754 | 2.8   | 1.3  | 0.3   | 5.4   | 0  |
| 2006 | July | 11 | 02:03:00 | 44.15 | -3.61 | 10  | 1.462 | 6.8   | 2.2  | 2.5   | 11.2  | 0  |
| 2006 | July | 11 | 00:04:00 | 44.61 | -3.93 | 9   | 1.462 | 6.2   | 2.1  | 2.1   | 10.3  | 14 |
| 2006 | July | 10 | 22:02:00 | 45.08 | -4.27 | 4   | 1.462 | 2.7   | 1.4  | 0.0   | 5.5   | 14 |
| 2006 | July | 10 | 20:02:00 | 45.55 | -4.60 | 7   | 1.462 | 4.8   | 1.8  | 1.2   | 8.4   | 14 |
| 2006 | July | 10 | 17:59:00 | 46.05 | -4.94 | 8   | 1.901 | 4.2   | 1.5  | 1.2   | 7.2   | 0  |
| 2006 | July | 10 | 15:58:00 | 46.57 | -5.45 | 12  | 2.193 | 5.5   | 1.6  | 2.3   | 8.6   | 0  |
| 2006 | July | 10 | 13:02:00 | 47.43 | -5.52 | 400 | 1.608 | 248.7 | 12.4 | 223.8 | 273.6 | 0  |
| 2006 | July | 10 | 12:04:00 | 47.70 | -5.53 | 471 | 1.462 | 322.1 | 14.8 | 292.5 | 351.8 | 0  |
| 2006 | July | 10 | 10:01:00 | 48.27 | -5.47 | 306 | 1.462 | 209.3 | 12.0 | 185.4 | 233.2 | 0  |
| 2006 | July | 10 | 08:00:00 | 48.76 | -5.04 | 510 | 1.462 | 348.8 | 15.4 | 317.9 | 379.7 | 0  |
| 2006 | July | 10 | 05:59:00 | 49.11 | -4.34 | 105 | 1.828 | 57.5  | 5.6  | 46.2  | 68.7  | 0  |
| 2006 | July | 10 | 03:59:00 | 49.45 | -3.68 | 13  | 2.193 | 5.9   | 1.6  | 2.6   | 9.2   | 0  |
| 2006 | July | 10 | 02:19:00 | 49.84 | -3.16 | 7   | 1.462 | 4.8   | 1.8  | 1.2   | 8.4   | 0  |
| 2006 | July | 9  | 23:57:00 | 50.22 | -2.02 | 52  | 1.462 | 35.6  | 4.9  | 25.7  | 45.4  | 0  |
| 2006 | July | 9  | 22:01:00 | 50.56 | -1.13 | 8   | 1.023 | 7.8   | 2.8  | 2.3   | 13.3  | 0  |

Table S23 – Summer 2007

| DATE |       |     |          | LOCATION |       | COCCOLITHOPHORES  |                   |                           |                           |                           |                           |                 |
|------|-------|-----|----------|----------|-------|-------------------|-------------------|---------------------------|---------------------------|---------------------------|---------------------------|-----------------|
| year | month | day | time     | lat      | lon   | number<br>counted | volume<br>counted | concentration<br>mean     | standard<br>error         | 95% confidence interval   |                           | % overcalcified |
|      |       |     | (UTC)    | (°N)     | (°E)  | (cells)           | (mLitres)         | (cells mL <sup>-1</sup> ) | (%)             |
| 2007 | May   | 10  | 03:00:52 | 43.98    | -3.49 | 191               | 1.835             | 104.1                     | 7.5                       | 89.0                      | 119.2                     | 1.6             |
| 2007 | May   | 9   | 23:02:59 | 45.17    | -3.92 | 145               | 1.090             | 133.0                     | 11.0                      | 110.9                     | 155.1                     | 5.5             |
| 2007 | May   | 9   | 21:02:01 | 45.76    | -4.18 | 50                | 1.658             | 30.1                      | 4.3                       | 21.6                      | 38.7                      | 18              |
| 2007 | May   | 9   | 14:59:25 | 47.44    | -5.02 | 96                | 1.845             | 52.0                      | 5.3                       | 41.4                      | 62.6                      | 25              |
| 2007 | May   | 9   | 11:03:50 | 48.50    | -5.43 | 35                | 0.951             | 36.8                      | 6.2                       | 24.3                      | 49.2                      | 14.3            |
| 2007 | May   | 25  | 13:30:00 | 43.92    | -3.29 | 142               | 0.651             | 218.1                     | 18.3                      | 181.5                     | 254.7                     | 10.6            |
| 2007 | May   | 24  | 13:59:57 | 47.24    | -5.47 | 179               | 0.895             | 199.9                     | 14.9                      | 170.0                     | 229.8                     | 32.4            |
| 2007 | May   | 24  | 12:00:00 | 47.88    | -5.45 | 201               | 0.762             | 263.9                     | 18.6                      | 226.7                     | 301.1                     | 18.9            |
| 2007 | May   | 26  | 08:00:06 | 49.13    | -4.28 | 101               | 0.909             | 111.1                     | 11.1                      | 89.0                      | 133.2                     | 62.4            |
| 2007 | May   | 26  | 10:00:03 | 49.53    | -3.51 | 191               | 0.899             | 212.4                     | 15.4                      | 181.7                     | 243.2                     | 3.1             |
| 2007 | June  | 156 | 14:41:43 | 46.81    | -5.40 | 25                | 0.929             | 26.9                      | 5.4                       | 16.1                      | 37.7                      | 24              |
| 2007 | June  | 156 | 12:41:02 | 47.43    | -5.43 | 109               | 0.915             | 119.1                     | 11.4                      | 96.3                      | 141.9                     | 11.9            |
| 2007 | June  | 156 | 10:03:39 | 48.21    | -5.41 | 319               | 0.390             | 817.4                     | 45.8                      | 725.9                     | 909.0                     | 0               |
| 2007 | June  | 156 | 06:04:11 | 49.11    | -4.44 | 136               | 1.089             | 124.9                     | 10.7                      | 103.5                     | 146.3                     | 23.5            |
| 2007 | July  | 193 | 02:02:24 | 44.27    | -3.66 | 4                 | 1.309             | 3.1                       | 1.5                       | 0.0                       | 6.1                       | 0               |
| 2007 | July  | 192 | 10:11:34 | 48.34    | -5.44 | 202               | 1.376             | 146.8                     | 10.3                      | 126.1                     | 167.4                     | 1               |
| 2007 | July  | 192 | 08:03:42 | 48.81    | -4.94 | 359               | 0.434             | 827.9                     | 43.7                      | 740.5                     | 915.3                     | 3.9             |
| 2007 | July  | 192 | 06:01:44 | 49.21    | -4.15 | 305               | 0.074             | 4103.1                    | 234.9                     | 3633.2                    | 4573.0                    | 0.3             |

Table S24 – May 2008 Biscay shelf edge

| Date     | Station ID | Lat (°N) | Long (°W) | Vol. filtered (mL) | E. huxleyi cells counted |                      |                  | % overcalcified |
|----------|------------|----------|-----------|--------------------|--------------------------|----------------------|------------------|-----------------|
|          |            |          |           |                    | Type A normal            | Type A overcalcified | Other morphotype |                 |
| 07.05.08 | 1          | 48.50    | 6.00      | 500                | 0                        | 0                    | 0                |                 |
| 08.05.08 | 2          | 47.80    | 6.90      | 500                | 5                        | 0                    | 0                | 0               |
| 10.05.08 | 5          | 48.20    | 7.59      | 500                | 42                       | 0                    | 3                | 0               |
| 22.05.08 | 5BIS       | 48.20    | 7.60      | 500                | 23                       | 0                    | 2                | 0               |
| 09.05.08 | 6          | 47.90    | 7.91      | 500                | 10                       | 24                   | 2                | 67              |
| 11.05.08 | 8          | 48.50    | 8.50      | 500                | 61                       | 0                    | 6                | 0               |

Samples courtesy of Lei Chou and colleagues (Université libre de Bruxelles) and enumerated by F. Sardenne.

Table S25 – Monthly averaged carbonate system parameters for the Bay of Biscay from 2008 to 2009

| Month  | DIC    | TA     | pH    | fCO <sub>2</sub><br>(µatm) | pCO <sub>2</sub><br>(µatm) | HCO <sub>3</sub> <sup>-</sup><br>(mmol/kgSW) | CO <sub>3</sub> <sup>2-</sup><br>(mmol/kgSW) | CO <sub>2</sub><br>(mmol/kgSW) | B Alk<br>(mmol/kgSW) | OH <sup>-</sup><br>(mmol/kgSW) | P Alk<br>(mmol/kgSW) | Si Alk<br>(mmol/kgSW) | Revelle | ΩCa  | ΩAr  | xCO <sub>2</sub><br>(dry<br>at 1<br>atm)<br>(ppm) |
|--------|--------|--------|-------|----------------------------|----------------------------|----------------------------------------------|----------------------------------------------|--------------------------------|----------------------|--------------------------------|----------------------|-----------------------|---------|------|------|---------------------------------------------------|
| Sep-08 | 2067.9 | 2348.3 | 8.094 | 354.7                      | 356.0                      | 1856.4                                       | 199.5                                        | 11.9                           | 88.5                 | 4.2                            | 0.1                  | 0.0                   | 10.152  | 4.74 | 3.07 | 363.5                                             |
| Oct-08 | 2075.6 | 2353.0 | 8.101 | 349.1                      | 350.3                      | 1866.2                                       | 197.4                                        | 12.0                           | 88.0                 | 3.9                            | 0.0                  | 0.0                   | 10.236  | 4.69 | 3.03 | 357.3                                             |
| Nov-08 | 2093.4 | 2361.4 | 8.115 | 336.8                      | 338.0                      | 1890.2                                       | 190.8                                        | 12.4                           | 86.2                 | 3.3                            | 0.1                  | 0.0                   | 10.482  | 4.52 | 2.91 | 343.9                                             |
| Dec-08 | 2120.5 | 2349.9 | 8.080 | 368.6                      | 370.0                      | 1941.0                                       | 164.9                                        | 14.6                           | 76.5                 | 2.4                            | 0.3                  | 0.1                   | 11.392  | 3.90 | 2.50 | 375.5                                             |
| Feb-09 | 2136.7 | 2348.9 | 8.068 | 380.4                      | 381.9                      | 1967.7                                       | 153.3                                        | 15.8                           | 72.2                 | 2.0                            | 0.5                  | 0.1                   | 11.890  | 3.63 | 2.32 | 387.0                                             |
| Mar-09 |        | 2347.5 |       |                            |                            |                                              |                                              |                                |                      |                                |                      |                       |         |      |      |                                                   |
| Apr-09 | 2110.3 | 2350.0 | 8.101 | 348.5                      | 349.8                      | 1925.1                                       | 171.4                                        | 13.8                           | 79.5                 | 2.5                            | 0.0                  | 0.0                   | 11.128  | 4.07 | 2.60 | 355.0                                             |
| May-09 | 2083.4 | 2345.5 | 8.132 | 320.1                      | 321.3                      | 1885.3                                       | 185.8                                        | 12.3                           | 85.7                 | 2.9                            | 0.0                  | 0.0                   | 10.585  | 4.41 | 2.83 | 326.3                                             |
| Jun-09 | 2064.8 | 2345.3 | 8.087 | 361.0                      | 362.2                      | 1853.1                                       | 199.7                                        | 12.0                           | 88.3                 | 4.3                            | 0.0                  | 0.0                   | 10.136  | 4.75 | 3.08 | 370.1                                             |
| Jul-09 | 2046.2 | 2344.1 | 8.098 | 350.5                      | 351.6                      | 1823.0                                       | 212.0                                        | 11.1                           | 92.0                 | 5.1                            | 0.0                  | 0.0                   | 9.798   | 5.07 | 3.30 | 360.1                                             |
| Aug-09 | 2066.8 | 2349.2 | 8.060 | 389.3                      | 390.6                      | 1852.3                                       | 202.3                                        | 12.2                           | 87.3                 | 4.9                            | 0.0                  | 0.0                   | 10.087  | 4.83 | 3.15 | 400.4                                             |

## Supporting Figure S1

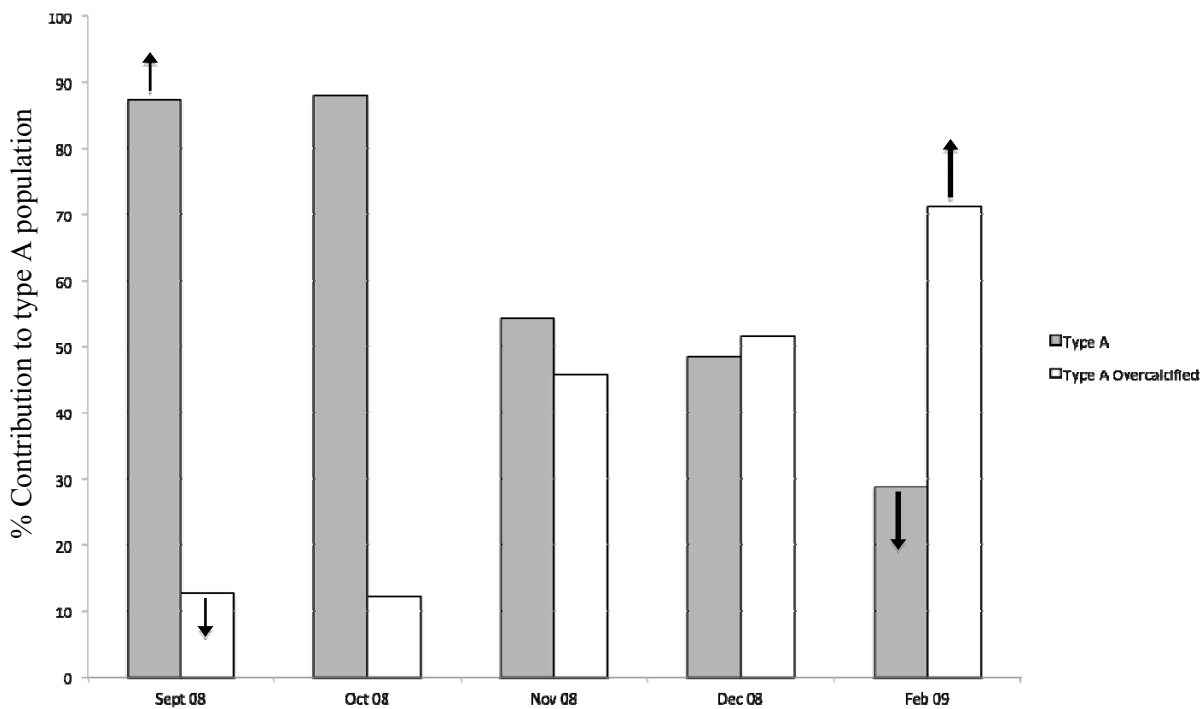

**Figure S1.** Variation in morphotype dominance of detached coccoliths by month. Counts are summed over all stations for the deep water in the Bay of Biscay (44°-46°N). Once 300 coccoliths of either morphotype had been counted in a set of images, no further counting was conducted for that morphotype, but counting of the other morphotype was continued. This led to a maximum estimate for the % overcalcified in September (% is no higher than the value shown), and a minimum estimate in February (% is at least as high as the value shown), as indicated by the arrows on the plot.
